# Chorioamnionitis Is a Risk Factor for Intraventricular Hemorrhage in Preterm Infants: A Systematic Review and Meta-Analysis

Eduardo Villamor-Martinez<sup>1</sup>, Monica Fumagalli<sup>2</sup>, Owais M. M. Mohammed Rahim<sup>1</sup>, Sofia Passera<sup>2</sup>, Giacomo Cavallaro<sup>2</sup>, Pieter Degraeuwe<sup>1</sup>, Fabio Mosca,<sup>2</sup> Eduardo Villamor<sup>1\*</sup>

<sup>1</sup>Department of Pediatrics, Maastricht University Medical Center (MUMC+), School for Oncology and Developmental Biology (GROW), Maastricht, the Netherlands.

<sup>2</sup>Neonatal Intensive Care Unit, Department of Clinical Sciences and Community Health, Fondazione IRCCS Cà Granda Ospedale Maggiore Policlinico, Università degli Studi di Milano, 20122 Milan, Italy

## \*Correspondence

Eduardo Villamor  
e.villamor@mumc.nl

**Abstract:** Although chorioamnionitis (CA) is a well-known risk factor for white matter disease of prematurity, the association with intraventricular hemorrhage (IVH) is controversial and has not been yet systematically reviewed. We performed a systematic review and meta-analysis of studies exploring the association between CA and IVH. A comprehensive literature search was conducted using PubMed/MEDLINE and EMBASE, from their inception to 1 July 2017. Studies were included if they examined preterm infants and reported primary data that could be used to measure the association between exposure to CA and the presence of IVH. A random-effects model was used to calculate odds ratios (OR) and 95% confidence intervals (CI). Of 1284 potentially relevant studies, 85 met the inclusion criteria (46,244 infants, 13,432 CA cases). Meta-analysis showed that CA exposure was significantly associated with all grades IVH (OR 1.88, 95% CI 1.61-2.19), with grades 1-2 IVH (OR 1.69, 95% CI 1.22-2.34), and with grades 3-4 IVH (OR 1.62, 95% CI 1.42-1.85). Both clinical and histological CA were associated with an increased risk for developing IVH in very preterm infants. In contrast, the presence of funisitis did not increase IVH risk when compared to CA in the absence of funisitis (OR 1.22, 95% CI 0.89-1.67). Additional meta-analyses showed that infants exposed to CA had significantly lower gestational age (GA; mean difference [MD] -1.20 weeks) and lower birth weight (BW; MD -55g) than the infants not exposed to CA. However, meta-regression and subgroup analysis could not demonstrate an association between the lower GA and BW and the risk of IVH in the CA-exposed infants. In conclusion, our data show that CA is a risk factor for IVH, but also a risk factor for being a younger and more clinically unstable preterm infant. In contrast to other complications of prematurity, such as patent ductus arteriosus, retinopathy of prematurity, or bronchopulmonary dysplasia, the effect of CA on IVH appears to be independent of CA as causative factor for very preterm birth.

**Keywords:** chorioamnionitis, intraventricular hemorrhage, very preterm infant, systematic review, meta-analysis

## 1. Introduction

## **E. Villamor-Martinez, M. Fumagalli et al. - Chorioamnionitis and Intraventricular Hemorrhage**

Germinal matrix hemorrhage–intraventricular hemorrhage (GMH-IVH) is one of the most common complications of prematurity (1-3). IVH typically initiates in the germinal matrix, which is a richly vascularized collection of neuronal-glia precursor cells in the developing brain and may disrupt the ependymal lining and extend into the lateral ventricle (1-3). Severe IVH consists of large amounts of intraventricular blood (usually termed grade 3 IVH) and may be complicated by hemorrhagic venous infarction in the periventricular white matter (usually termed grade 4 IVH) or by post-hemorrhagic hydrocephalus or both (1, 2). Severe IVH is associated with increased mortality as well as short- and long-term neurological morbidity, while the long-term neurological outcome of milder forms of IVH (grade 1-2) is still debated and remains an active area of research (1, 2, 4)

As extensively reviewed by Inder et al., the pathogenesis of IVH is multifactorial and may involve intravascular, vascular, and extravascular factors (2). Intravascular factors relate to the regulation of blood flow, pressure, and volume in the microvascular bed of the germinal matrix as well as to platelet-capillary function and blood clotting capability (2). Vascular factors refer to the intrinsic fragility and vulnerability of germinal matrix blood vessels (2). Extravascular factors include the poor support of the extravascular space surrounding the germinal matrix capillaries, the postnatal decrease in extravascular tissue pressure, and an excessive fibrinolytic activity (2). Of note, not all the pathogenetic factors are present in every IVH and “clinical circumstances dictate which factors are most critical in the individual infant”(2). Among these clinical circumstances, very preterm birth, generally defined as birth before 32 completed weeks of gestation, is the most consistently associated with the development of IVH. However, a number of risk factors including, among others, absent antenatal corticosteroid (ACS) treatment, vaginal delivery, peri- and postnatal hypoxic-ischemic events, severe respiratory distress syndrome (RDS), pneumothorax, hypercapnia, hemodynamic disturbances (either systemic hypertension or hypotension), rapid volume expansion, decreased hematocrit, glucose and/or electrolyte disturbances, seizures, patent ductus arteriosus (PDA), thrombocytopenia, inherited thrombophilia, and infection may predispose to the development of IVH (1-3, 5-8).

Several studies suggest that IVH is unequally distributed among the different leading causes of very preterm delivery (9, 10). An estimated 40% of very preterm births are associated with placental inflammation, which is often subclinical. This inflammation may be localized to the maternal placenta or membrane (chorioamnionitis) or progress to a fetal inflammatory response, as evidenced by cord inflammation (funisitis) (11-16). Chorioamnionitis (CA) is not only a major risk factor for (very) preterm birth, but it is also considered a major contributor to prematurity-associated morbidity and mortality (11-16). The pathogenetic role of CA in the development of adverse outcomes of prematurity, such as bronchopulmonary dysplasia (BPD) (17), necrotizing enterocolitis (NEC), PDA, retinopathy of prematurity (ROP), or cerebral palsy has been addressed in a number of systematic reviews (17-23). Although intrauterine inflammation is a well-known risk factor for white matter disease of prematurity (24), the association with IVH is controversial and has not been yet systematically reviewed. We aimed to perform a systematic review and meta-analysis of studies exploring the association between CA and IVH. We used an extensive search strategy, which included not only studies describing IVH as outcome after exposure to CA, but also studies that assessed CA as potential risk factor for IVH. In addition, we analyzed the magnitude of the differences in potential confounders, such as GA, birth weight (BW), exposure to ACS, mode of delivery,

## **E. Villamor-Martinez, M. Fumagalli et al. - Chorioamnionitis and Intraventricular Hemorrhage**

sepsis, PDA, or RDS between the infants of the CA and the control group. Finally, we performed a meta-regression to investigate the effect of confounders on the association between CA and IVH.

### **2. Methods**

The methodology of this study was based on that of earlier meta-analyses on CA and PDA (20), and CA and ROP (22). A protocol was developed prospectively that detailed the specific objectives, criteria for study selection, the approach to assessing study quality, clinical outcomes, and statistical methodology. The study was conducted and reported according to the guidelines of the Preferred Reporting Items for Systematic Reviews and Meta-Analyses (PRISMA) (25).

#### **2.1 Sources and search strategy**

A comprehensive literature search was conducted using the PubMed/MEDLINE and EMBASE databases from their inception to July 1, 2017. The search terms involved various combinations of the following keywords: “chorioamnionitis”, “intrauterine infection” “intrauterine inflammation”, “antenatal infection” “antenatal inflammation” “intraventricular hemorrhage”, “risk factors”, “outcome”, “cohort”, and “case-control”. No language limit was applied. Additional strategies to identify studies included manual review of reference lists of key articles that fulfilled our eligibility criteria and of reviews on chorioamnionitis, use of the “related articles” feature in PubMed, and use of the “cited by” tool in Google scholar and Web of Science.

#### **2.2 Study selection**

Studies were included if they examined preterm (<37 weeks) or low BW (<2500g) infants and reported primary data that could be used to measure the association between exposure to CA and the presence of IVH. We included both studies that described IVH as an outcome after exposure to CA, and studies that assessed CA as a risk factor for IVH. To identify relevant studies, two reviewers (O.M.R., E.V.) independently screened the results of the searches and applied inclusion criteria using a structured form. Discrepancies were resolved through discussion or in consultation with a third reviewer (P.D.).

#### **2.3 Data extraction**

Two investigators (E.V.-M., O.M.R.) independently extracted data from included studies using a predetermined data extraction form and another two investigators (P.D., E.V.) checked data extraction for accuracy and completeness. Discrepancies were resolved by consulting the primary report. Data extracted from each study included citation information, language of publication, location where research was conducted, objectives, study design, definitions of CA and IVH, inclusion/exclusion criteria, patient characteristics, and results (including raw numbers, summary statistics and adjusted analyses on CA and IVH where available).

#### **2.4 Quality assessment**

Methodological quality was assessed using the Newcastle-Ottawa Scale for cohort or case-control studies (26). This scale uses a point rating system (range: 0-9 points) that scores three aspects of a study: selection (0-4 points), comparability (0-2 points) and exposure/outcome

## E. Villamor-Martinez, M. Fumagalli et al. - Chorioamnionitis and Intraventricular Hemorrhage

(0-3 points). Two reviewers (E.V.-M. and E.V.) independently assessed the methodological quality of each study. Discrepancies were resolved through discussion.

### 2.5 Statistical Analysis

Studies were combined and analyzed using COMPREHENSIVE META-ANALYSIS V 3.0 software (CMA, RRID:SCR\_012779, Biostat Inc., Englewood, NJ, USA). For dichotomous outcomes, the odds ratio (OR) with 95% confidence interval (CI) was calculated from the data provided in the studies. ORs adjusted for potential confounders were extracted from the studies reporting these data. For continuous outcomes, the mean difference (MD) with 95% CI was calculated. When studies reported continuous variables as median and range or interquartile range, we estimated the mean and standard deviation using the method of Wan et al. (27). Due to anticipated heterogeneity, summary statistics were calculated with a random-effects model. This model accounts for variability between studies as well as within studies.

Subgroup analyses were conducted according to the mixed-effects model (28). In this model, a random-effects model is used to combine studies within each subgroup and a fixed-effect model is used to combine subgroups and yield the overall effect. The study-to-study variance ( $\tau^2$ ) is not assumed to be the same for all subgroups. This value is computed within subgroups and not pooled across subgroups. Statistical heterogeneity was assessed by Cochran's  $Q$  statistic and by the  $I^2$  statistic, which is derived from  $Q$  and describes the proportion of total variation that is due to heterogeneity beyond chance (29). We used the Egger's regression test and funnel plots to assess publication bias.

To explore differences between studies that might be expected to influence the effect size, we performed univariate random-effects meta-regression (method of moments) (30). The potential sources of variability defined a priori were: CA type (clinical or histological), funisitis, differences in GA and BW between the infants with and without CA, use of ACS, mode of delivery, rate of small for gestational age (SGA), rate of premature rupture of membranes (PROM), rate of preeclampsia, rate of early onset sepsis (EOS), rate of late onset sepsis (LOS), rate of RDS, rate of PDA and mortality. A probability value of less than 0.05 (0.10 for heterogeneity) was considered statistically significant.

## 3. Results

### 3.1 Description of studies

Of 1284 potentially relevant studies, 85 (7, 31-114) met the inclusion criteria. The flow diagram of the search is shown in Figure 1. The included studies evaluated 46,244 infants, including 13,432 cases of CA. The included studies and their characteristics are summarized in Supplementary Table 1. In 58 studies, the aim was to examine the outcomes, including IVH, of preterm infants with and without maternal CA. Twenty-four studies examined the risk factors for IVH, including maternal CA. Five studies studied the association between CA and IVH as their primary outcome (36, 73, 94, 114, 115). Fifty-four studies used a histological definition of CA and 24 studies used a clinical definition of CA. Only two studies (56, 62) provided data on microbiological CA and IVH. In one study (78) IVH was associated with clinical and histological CA separately. In four studies (49, 54, 63, 110) infants were assigned to the CA group if they had clinical and/or histological CA.

## E. Villamor-Martinez, M. Fumagalli et al. - Chorioamnionitis and Intraventricular Hemorrhage

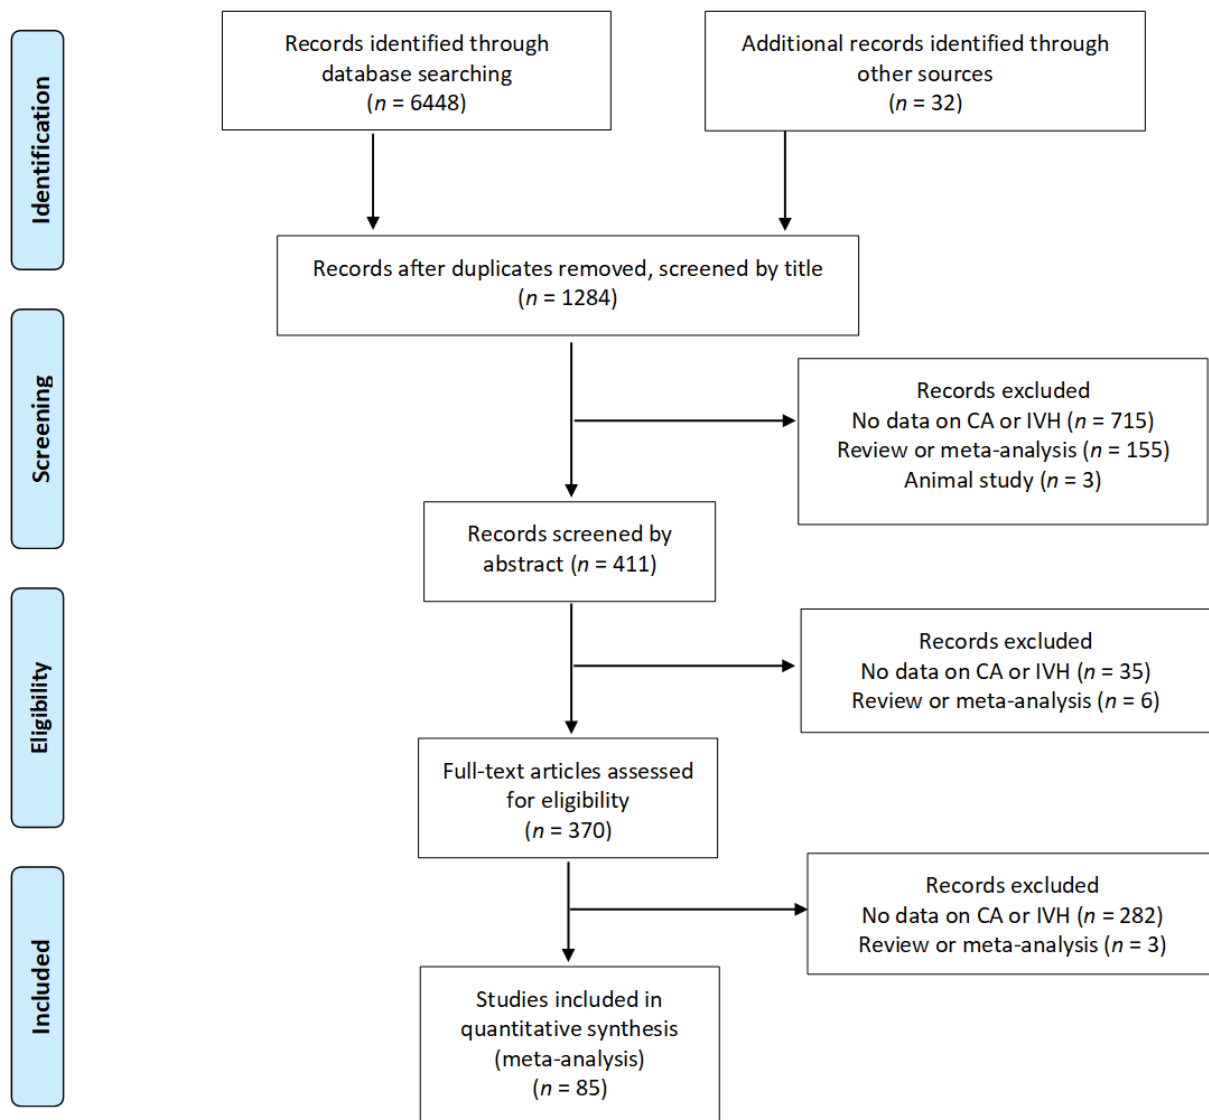

**Figure 1.** Flow diagram of search process.

### 3.2 Quality assessment

The quality of each study according to the Newcastle-Ottawa Scale is summarized in Supplementary Table 2. One study received a quality score of 5 points, 19 studies achieved a quality score of six points, 43 studies achieved a quality score of seven points, 11 studies achieved a quality score of eight, and 11 studies achieved the maximum score of 9 points. Studies were downgraded in quality for not adjusting the risk of IVH for confounders ( $k = 62$ ), for not defining IVH clearly ( $k = 9$ ), for only adjusting the risk of IVH for one confounding factor ( $k = 7$ ), for not defining CA clearly ( $k = 6$ ), and for losing a substantial portion of infants to follow-up ( $k = 4$ ).

### 3.3 Analysis based on unadjusted data



**E. Villamor-Martinez, M. Fumagalli et al. - Chorioamnionitis and Intraventricular Hemorrhage**

Meta-analysis showed that CA exposure was significantly associated with all grades IVH (Figure 2A), with grades 2-4 IVH (Figure 2B), with grades 1-2 IVH (2C), and with grades 3-4 IVH (Figure 2D). When the type of CA was analyzed separately, histological CA remained significantly associated with all grades IVH (Figure 3), with grades 2-4 IVH (Figure 2B), with grades 1-2 IVH (Figure 2C), and with grades 3-4 IVH (Figure 4). Clinical CA was significantly associated with all grades IVH (Figure 5) and with grades 3-4 IVH (Figure 6), but not with grades 1-2 IVH (Figure 2C). There was only one study providing data on the association of clinical CA and IVH grades 2-4 (Figure 2B). Neither visual inspection of the funnel plot (Figure 7) nor the regression test of Egger revealed evidence of publication bias.

**A. All grades IVH**

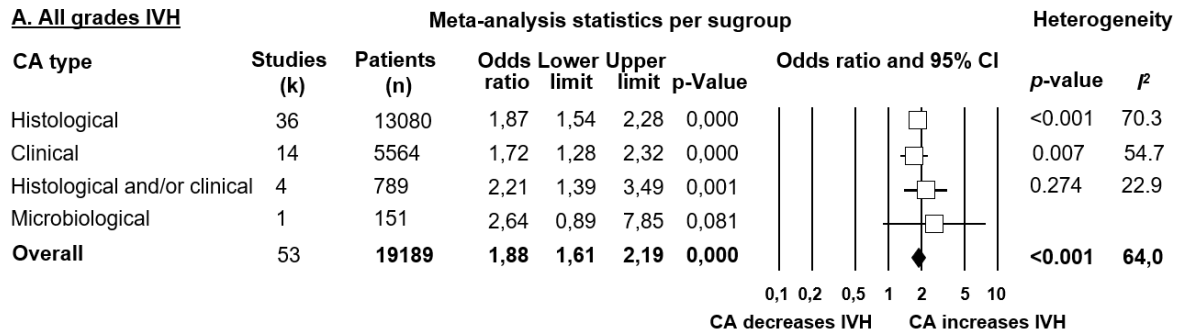

**B. Grades 2-4 IVH**

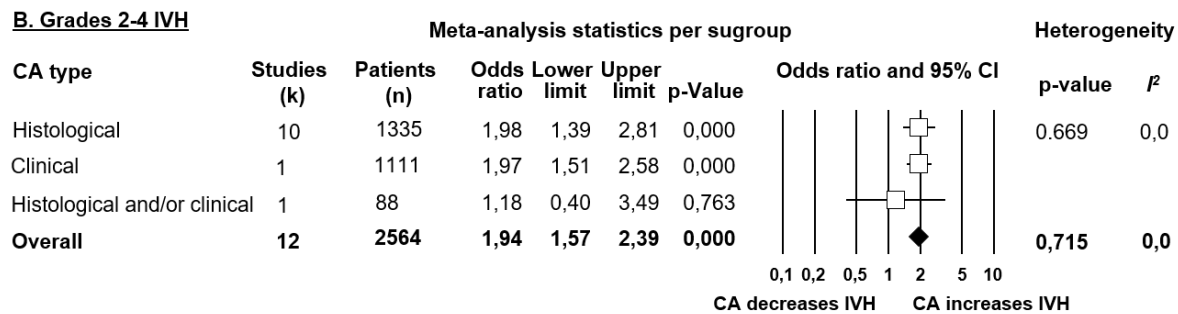

**C. Grades 1-2 IVH**

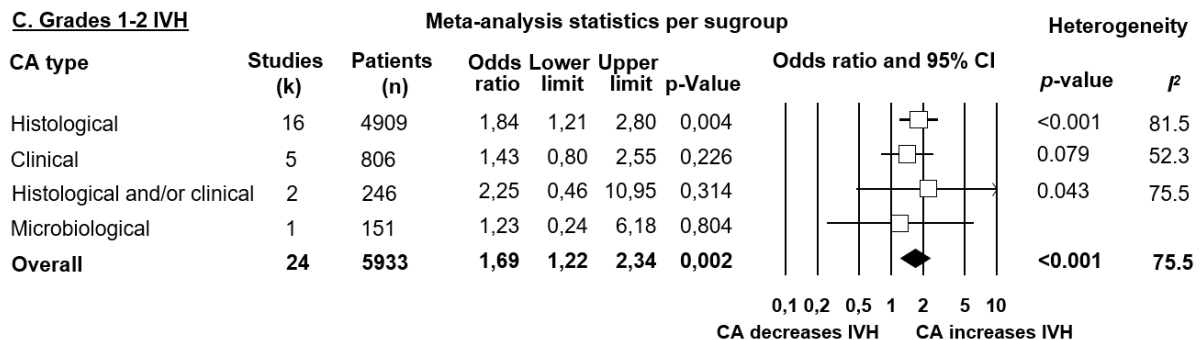

**D. Grades 3-4 IVH**

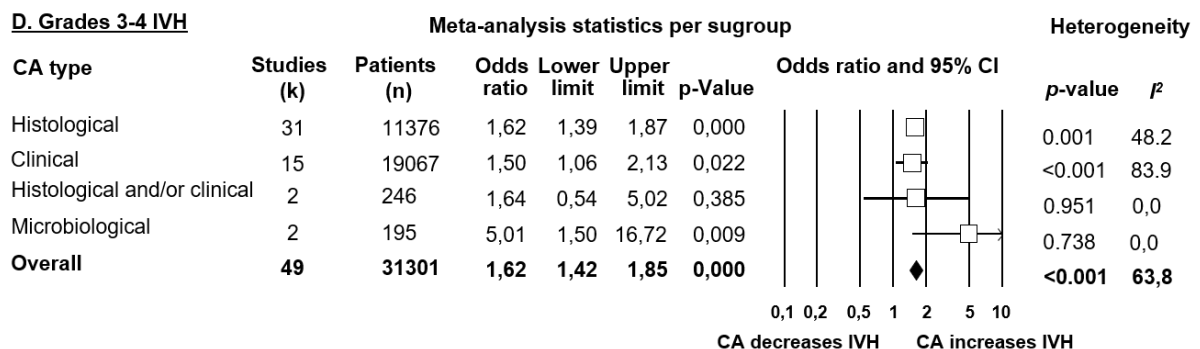

E. Villamor-Martinez, M. Fumagalli et al. - Chorioamnionitis and Intraventricular Hemorrhage

**Figure 2.** Meta-analyses of the association between chorioamnionitis (CA) and intraventricular hemorrhage (IVH), according to definition of IVH.

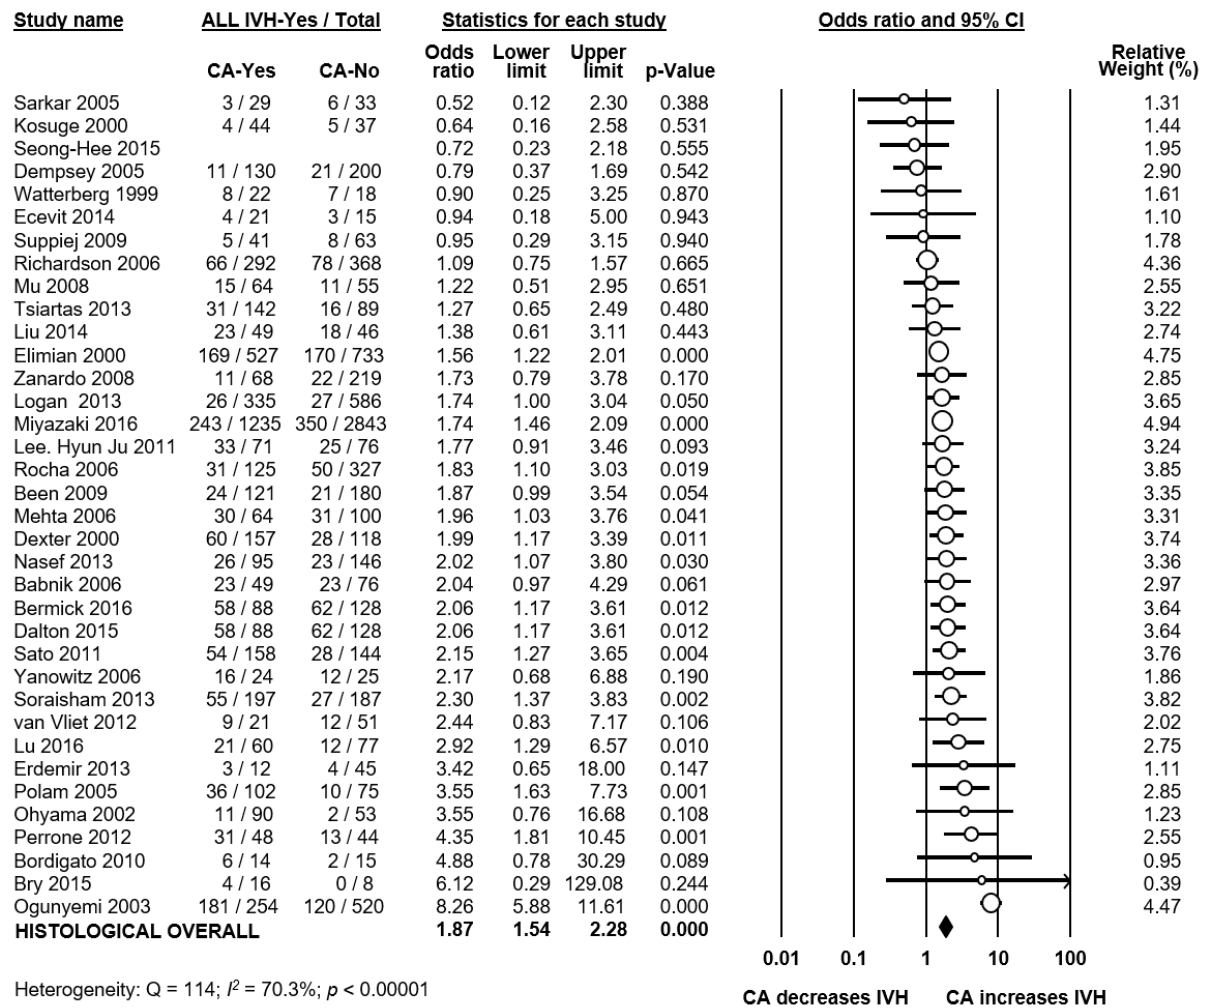

**Figure 3.** Meta-analysis of the association between histological chorioamnionitis (CA) and all grades intraventricular hemorrhage (IVH).

**E. Villamor-Martinez, M. Fumagalli et al. - Chorioamnionitis and Intraventricular Hemorrhage**

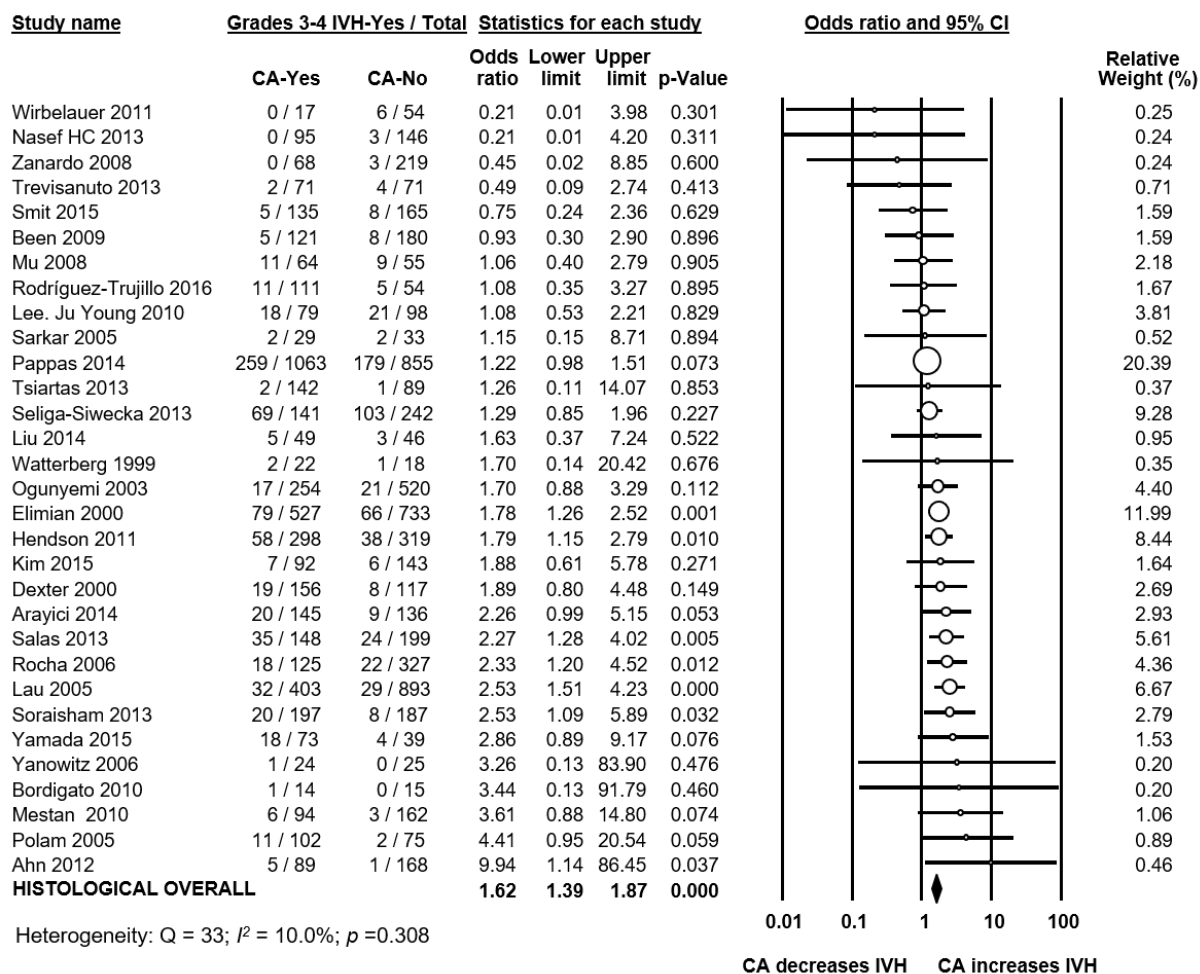

**Figure 4.** Meta-analysis of the association between histological chorioamnionitis (CA) and grades 3-4 intraventricular hemorrhage (IVH).



**E. Villamor-Martinez, M. Fumagalli et al. - Chorioamnionitis and Intraventricular Hemorrhage**

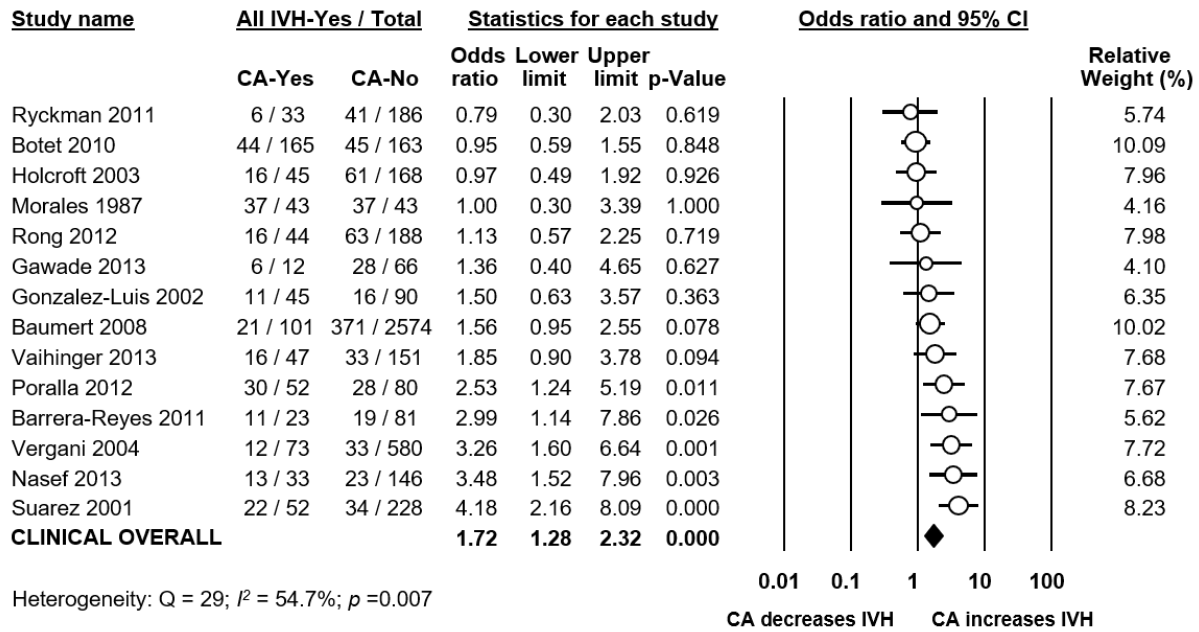

**Figure 5.** Meta-analysis of the association between clinical chorioamnionitis (CA) and all grades intraventricular hemorrhage (IVH).

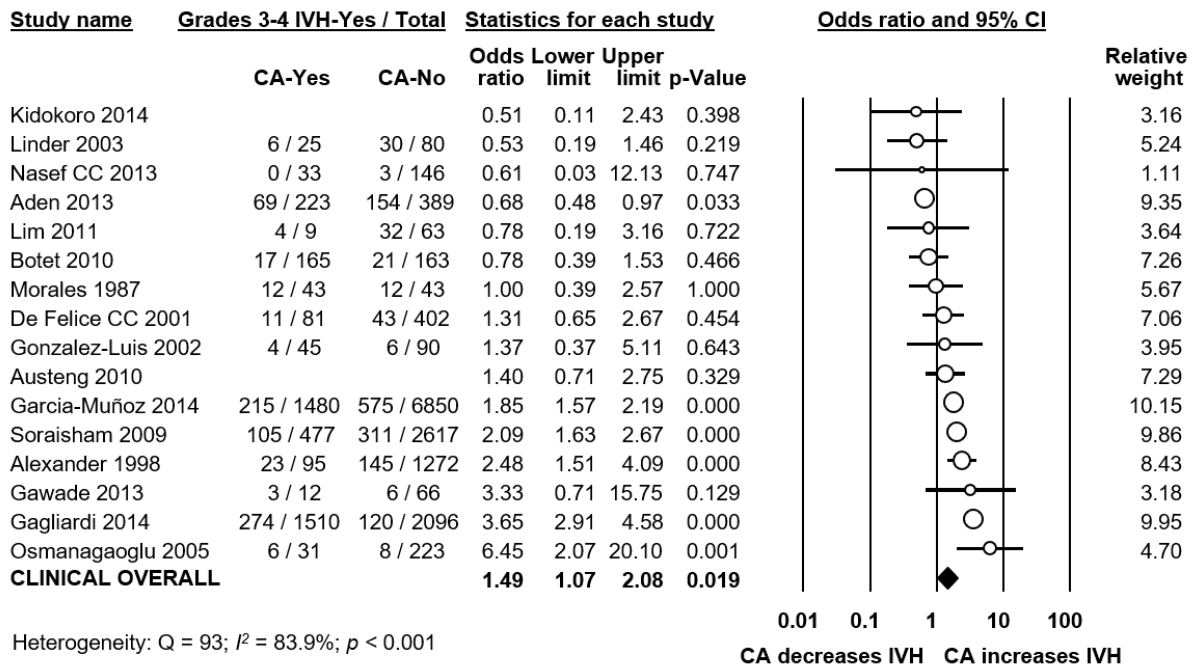

**Figure 6.** Meta-analysis of the association between clinical chorioamnionitis (CA) and grades 3-4 intraventricular hemorrhage (IVH).

### E. Villamor-Martinez, M. Fumagalli et al. - Chorioamnionitis and Intraventricular Hemorrhage

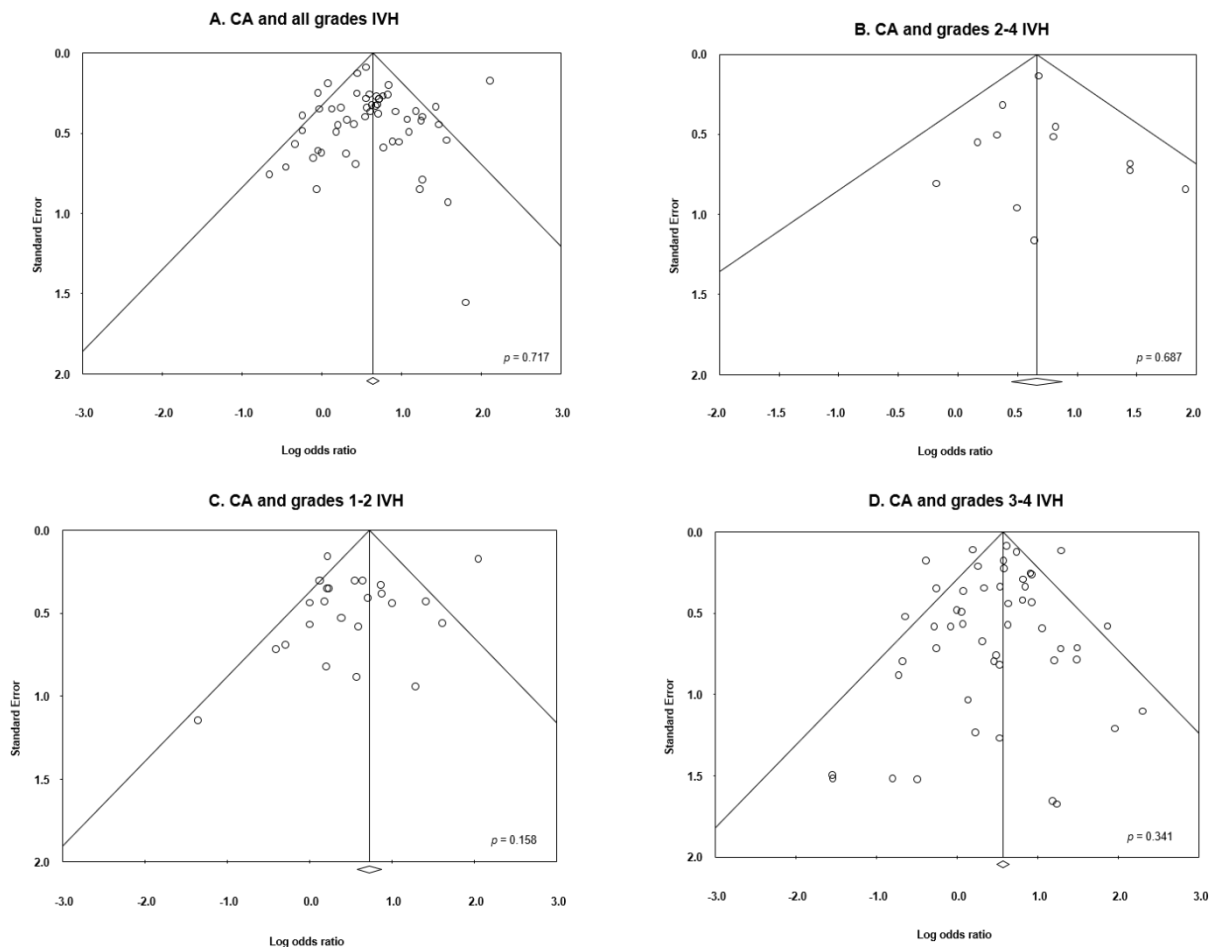

**Figure 7.** Funnel plots assessing publication bias for the association between chorioamnionitis (CA) and intraventricular hemorrhage (IVH).

### 3.4 Analysis of covariates

To explore the possible differences in baseline characteristics between the groups of exposed and non-exposed to CA, we performed additional meta-analyses. As summarized in Table 1, infants exposed to CA showed significantly lower GA and BW. Moreover, infants with CA had significantly higher rates of exposure to ACS, significantly higher rates of premature rupture of membranes (PROM), significantly higher rates of EOS, significantly higher rates of LOS, and significantly higher rates of PDA (Table 1). Infants with CA also had significantly lower rates of cesarean delivery, significantly lower rates of small for gestational age (SGA) and significantly lower rates of preeclampsia (Table 1).

To analyze the possible influence of the GA and BW on the unadjusted association between CA and IVH, we performed meta-regression analysis. As depicted in Table 2, this analysis showed that the differences in GA or BW between the CA exposed and non-exposed groups were not significantly correlated with the effect size of the association between CA and IVH.

To further analyze the effect of GA on the risk of IVH, we carried out subgroup analyses. We found that in the group of studies where the CA-group did not differ significantly ( $p > 0.05$ ) in GA from the control group, CA was a risk factor for all grades IVH but not for grades 3-4 IVH (Table 4). We analyzed a subgroup of studies where the CA-group had a MD in GA of  $\leq 0.5$  weeks, and we found that CA was a risk factor for all grades IVH and for grades 3-4

### E. Villamor-Martinez, M. Fumagalli et al. - Chorioamnionitis and Intraventricular Hemorrhage

IVH (Table 4). We also found a that in studies where the CA-group had a MD in GA of less than 1 week, CA was a risk factor for all grades IVH and for grades 3-4 IVH (Table 4).

We carried out further meta-regression analysis to examine the role of other covariates in the association between CA and IVH. Meta-regression could not find a significant difference in IVH risk between infants with clinical and infants with histological CA (Table 3). Meta-regression did find a significant association between the CA-associated risk of grades 3-4 IVH and the risk of preeclampsia (Supplementary Figure 1), mortality (Supplementary Figure 2), risk of LOS (Supplementary Figure 3) and risk of PDA (Supplementary Figure 4) Other meta-regressions could not find a significant association between the CA-associated risk of IVH and other covariates (Table 3).

### 3.5 Analysis of funisitis

We performed additional analyses aimed at evaluating the role of the presence of a fetal inflammatory response (i.e. funisitis) on the development of IVH. Thirteen studies reported on IVH (36, 39, 61, 65, 70, 71, 74, 82, 88, 89, 98, 103, 104) in infants with histological CA with or without funisitis. As shown in Figure 8, meta-analysis could not show a significant difference in IVH risk between infants with funisitis and infants with CA without funisitis (OR all grades IVH: 1.22, 95% CI 0.89 to 1.67; grades 3-4 IVH: 1.17, 95% CI 0.74 to 1.85). Using meta-regression, we also found no significant difference in IVH risk between infants with funisitis, and infants with CA without funisitis (Table 3).

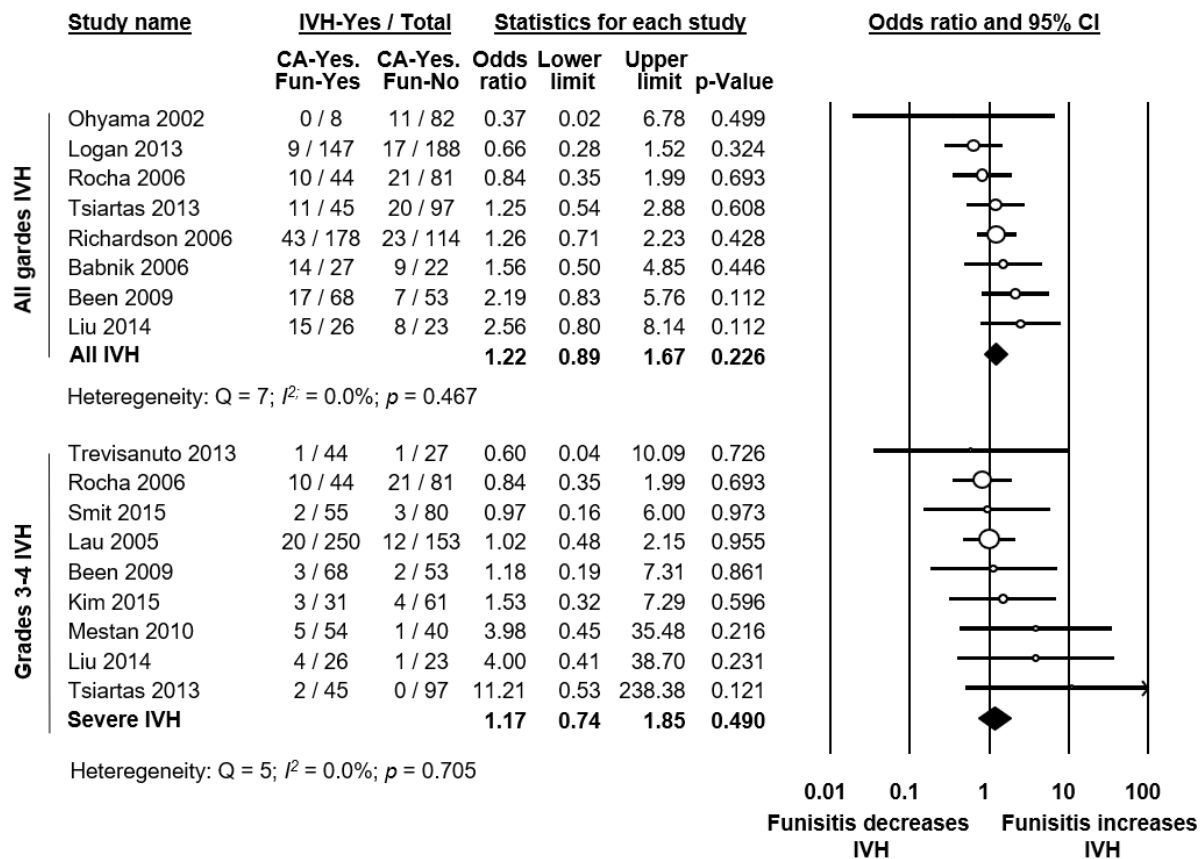

## E. Villamor-Martinez, M. Fumagalli et al. - Chorioamnionitis and Intraventricular Hemorrhage

**Figure 8.** Meta-analysis of the association between funisitis and intraventricular hemorrhage (IVH). Fun: funisitis; CI: confidence interval.

### 3.6 Analysis based on adjusted data

Thirteen studies adjusted the association between CA and the risk of IVH for confounding factors. As shown in Supplementary Table 3 and 4, studies adjusted for different covariates. Meta-analysis pooling this adjusted data found that CA was significantly associated with a higher risk of all grades IVH (OR 1.25, 95% CI 1.02 to 1.53, Supplementary Table 3). This association became non-significant when only analyzing studies which used a histological definition of CA (Supplementary Table 3). Meta-analysis of adjusted data also found a significant association between CA and grades 3-4 IVH (OR 1.22, 95% CI 1.04 to 1.43, Supplementary Table 4). This association became non-significant when grouping studies by clinical or histological CA definition (Supplementary Table 4).

## 4. Discussion

The current systematic review and meta-analysis demonstrates that both clinical and histological CA are associated with an increased risk for developing IVH in very preterm infants. In contrast, the presence of funisitis did not increase IVH risk when compared to CA in the absence of funisitis. Additional meta-analyses showed that infants exposed to CA had significantly lower GA and lower BW than the infants not exposed to CA. However, meta-regression and subgroup analysis could not demonstrate an association between the lower GA and BW and the risk of IVH in the CA-exposed infants. This suggests that the effects of CA on HIV risk might be at least partially independent on the role of CA as etiological factor for very preterm birth.

The association between CA and increased risk of HIV is biologically and clinically plausible. IVH generally occurs within the three first days of life and affects the infants with higher hemodynamic and respiratory instability, frequently associated with extreme prematurity and/or severe perinatal infections (2, 116). Therefore, the clinical circumstances around birth and during the first days of life are critical for the development of IVH. Our study confirms previous reports showing that these clinical circumstances are different in CA-exposed and CA-unexposed very preterm infants (17, 20, 22). Thus, infants exposed to CA were born significantly earlier ( $\approx 1.2$  weeks), were lighter ( $\approx 55$  g), and had a higher rate of exposure to antenatal corticosteroids, PROM, vaginal delivery, early and late onset sepsis, and PDA. As mentioned in the introduction, some of these factors may have affected IVH risk.

The degree of prematurity is the most important predisposing factor for the occurrence of IVH (1-3), as well as for other complications of prematurity such as BPD, ROP, NEC, or PDA (20, 22, 23, 117, 118). Nevertheless, very preterm birth is always a pathological event and very preterm infants carry a mortality/morbidity risk conferred by whatever condition led to their early delivery (119-122). Therefore, CA may affect infant morbidity through inducing very preterm birth or through the deleterious effects of infection/inflammation. Interestingly, previous meta-analyses showed an association between the lower gestational age of the CA-exposed group and the CA-associated risk of BPD (117), PDA (20), and ROP (22, 23). In

### **E. Villamor-Martinez, M. Fumagalli et al. - Chorioamnionitis and Intraventricular Hemorrhage**

contrast, our meta-regression could not show that the difference in GA between CA-exposed and CA-unexposed infants significantly correlated with IVH risk. Moreover, we performed subgroup analyses in which we only included the studies showing small or no differences in GA between the CA-exposed and the control group and we observed that the significant IVH risk was maintained in this subgroup of studies. In contrast, this was not the case when the same subgroup analysis was performed for PDA (20) or ROP (22, 23). Altogether this suggests that CA may increase complications such as PDA or ROP through GA-dependent mechanisms, whereas the effect on IVH may be mediated by GA-independent mechanisms.

Besides GA, several other factors potentially confound the association between CA and IVH. A number of studies adjusted for important potential confounders, although the number and nature of confounders varied between studies. We performed separate analyses aggregating adjusted association measures. This reduced or made non-significant the association between CA and IVH (Supplementary Table 3 and 4). Previous meta-analyses on the relationship between CA and BPD (17), cerebral palsy (18), and ROP (22) also showed that the positive association observed with unadjusted data was significantly reduced, or became non-significant, when adjusted data were pooled. Moreover, the significant positive association between CA and PDA became a significant negative association when only adjusted data were analyzed (20).

Adjustment for potential confounders, particularly for GA and/or BW, is widely used in observational studies examining predictors of neonatal outcomes after preterm birth. However, this approach is controversial and can lead to biased conclusions (119, 121). As mentioned above, neonatal adverse outcomes depend both on immaturity and on the conditions that caused preterm birth (119-121). Therefore, very low GA would represent both a risk factor per se and a mediator in the causal pathway linking cause of preterm birth to outcome (119, 121). Adjustment for an intermediate variable might introduce bias unless all mediator–outcome confounders are taken into account in the analysis (119, 121, 123, 124). As assessed by Gagliardi et al. (121), the difficulty of achieving, at least at the current level of knowledge of etiology of preterm birth, full control of all mediator–outcome confounders limits the possibility of causal interpretation of the associations found, but it does not limit their descriptive value. In this sense, our meta-analysis may be a valuable contribution to the understanding of CA as etiopathogenic factor of both prematurity and IVH.

Our data suggest that CA-exposed infants are not only younger but also more clinically unstable than the non-exposed infants. This is reflected in the higher mortality and the higher rate of sepsis and PDA in CA-exposed infants (Table 1). Of note, meta-regression showed a correlation between the effect size of the association between CA and grade 3-4 IVH and the effect sizes of the association between CA and PDA. As mentioned elsewhere, the presence of a hemodynamically relevant PDA has been correlated with the occurrence of IVH and the proposed mechanism is the disturbance of cerebral blood flow (2, 3, 8, 125). Our data support this association between IVH and PDA in CA-exposed infants.

The biological plausibility of the association between CA and IVH is supported by the direct and indirect effects of inflammatory mediators. Hemodynamic disturbances in preterm infants with CA have been correlated with elevated cord blood concentrations of proinflammatory cytokines such as IL-6, IL-1beta and TNF-alfa (126). Cytokines can act directly on the vascular smooth muscle, producing vascular relaxation and hypotension or indirectly by



## E. Villamor-Martinez, M. Fumagalli et al. - Chorioamnionitis and Intraventricular Hemorrhage

increasing vascular endothelial production of prostacyclin and nitric oxide (126). In addition, cytokines can eventually promote a neuro-inflammatory cascade in the fetal brain penetrating across the blood brain barrier or activating specific receptors such as CD14 and TLR4 which are constitutively expressed in the circumventricular organs, choroid plexus and leptomeninges (127, 128). Inflamed glial or endothelial cells, challenged by external stimuli, enhance the release/expression of various chemoattractants and adhesion molecules which may promote the platelet and neutrophil activation and adhesion determining possible endothelial cell damage and changes in blood rheology and flow (129, 130). These changes, occurring inside the fragile germinal matrix capillaries or within the vascular connection between germinal matrix and the subependymal venous network, may increase the likelihood of IVH in preterm infants with CA.

It should be noted that not all intraamniotic infections will lead to an inflammatory process extending to the fetal component (131). Funisitis is considered the histologic counterpart of the fetal inflammatory response syndrome (16, 132). Our study showed that the presence of funisitis combined with CA did not significantly increase the odds of having IVH, when compared with CA in the absence of funisitis. This is an argument against the fetal inflammatory response as etiopathogenic factor for IVH. We have previously reported that funisitis is not an additional risk factor for developing PDA (20) but the presence of funisitis significantly increased the risk of developing severe ROP (22).

Our meta-analysis has several limitations that should be considered. First, the published literature showed great heterogeneity in definition of CA, and in assessment of confounders. Particularly, criteria for the use of the term clinical CA are highly variable and recent recommendations propose to restrict the term CA to pathologic diagnosis (133). Second, in most of the included studies the analysis of the association between CA and IVH was not the main objective. Third, adjusted data were available only from 13 of the 85 studies included in the meta-analysis. In addition, we had to rely on the adjusted analyses as presented in the published reports and the variables which they included, which were not consistent across studies. On the other hand, the strengths of the present study are the large number of included studies; the use of rigorous methods including extensive and comprehensive search; duplicate screening, inclusion, and data extraction to reduce bias; the use of meta-analysis of baseline and secondary characteristics and the use of meta-regression to control for potential confounders.

One important limitation, inherent to any meta-analysis on IVH, is the possible heterogeneity of the definition of the condition. The grading system most commonly used for IVH in the infant was first reported by Papile et al. and later modified by Volpe and is based on the presence and amount of blood in the germinal matrix, lateral ventricles, and periventricular white matter (1). Grade 1 represents germinal matrix hemorrhage only with no or minimal IVH (<10% of ventricular area on parasagittal view). Grade 2 represents IVH occupying 10–50% of ventricular area on parasagittal view. Grade 3 is IVH with hemorrhage occupying > 50% of ventricular area on parasagittal view. Grade 4 represents severe IVH with associated periventricular echodensity (1). Although grade 4 IVH is a periventricular hemorrhagic infarction rather than an extension of IVH per se, the 1-4 grading system remains pervasive in the literature and clinical setting despite debate regarding appropriate nomenclature (134). In addition grade 3 and 4 IVHs are frequently grouped together as severe or high grade IVH (134). Nevertheless, our meta-analysis shows a significant increased risk of both severe and



## **E. Villamor-Martinez, M. Fumagalli et al. - Chorioamnionitis and Intraventricular Hemorrhage**

less severe (grade 1-2) IVH in CA-exposed infants. Therefore, potential differences in IVH classification may not have affected the results.

In conclusion, IVH is a multifactorial complication that is more common in the youngest and sickest preterm infants. Our data show that CA is a risk factor for IVH, but also a risk factor for being a younger and more clinically unstable preterm infant. In contrast to other complications of prematurity, such as PDA, ROP, or BPD (20, 22, 23, 117), the effect of CA on IVH appears to be independent of CA as causative factor for very preterm birth.

### **5. Conflict of Interest**

The authors declare that the research was conducted in the absence of any commercial or financial relationships that could be construed as a potential conflict of interest.

### **6. Author Contributions**

E.V.-M. carried out data collection, carried out statistical analyses, assessed methodological quality, contributed to interpretation of results, drafted the initial manuscript, and reviewed and revised the manuscript. M.F. contributed to statistical analysis and interpretation of results and reviewed and revised the manuscript. O. M. R. selected studies for inclusion, carried out data collection and carried out statistical analyses. S.P. contributed to interpretation of results and reviewed and revised the manuscript. G.C. contributed to interpretation of results and reviewed and revised the manuscript. P.D. carried out and supervised data collection and contributed to interpretation of results. F.M. contributed to interpretation of results and reviewed and revised the manuscript. E.V. conceptualized and designed the study, carried out the search and selected studies for inclusion, supervised data collection, contributed to statistical analyses and interpretation of results, and reviewed and revised the manuscript. All authors approved the final manuscript as submitted.

### **7. Data Availability Statement**

The datasets generated and analyzed for this study can be found in the Supplementary Material linked to this article, at....

### **8. References**

1. Volpe JJ. Impaired neurodevelopmental outcome after mild germinal matrix-intraventricular hemorrhage. *Pediatrics*. 2015:peds. 2015-3553.
2. Inder TE, Perlman JM, Volpe JJ. Preterm Intraventricular Hemorrhage/Posthemorrhagic Hydrocephalus. *Volpe's Neurology of the Newborn (Sixth Edition)*: Elsevier; 2018. p. 637-98. e21.
3. Ballabh P. Intraventricular hemorrhage in premature infants: mechanism of disease. *Pediatric research*. 2010;67(1):1.

### E. Villamor-Martinez, M. Fumagalli et al. - Chorioamnionitis and Intraventricular Hemorrhage

4. Tortora D, Severino M, Malova M, Parodi A, Morana G, Sedlacik J, et al. Differences in subependymal vein anatomy may predispose preterm infants to GMH–IVH. *Archives of Disease in Childhood-Fetal and Neonatal Edition*. 2017:fetalneonatal-2017-312710.
5. Romantsik O, Bruschetti M, Calevo MG, Banzi R, Ley D. Pharmacological pain and sedation interventions for the prevention of intraventricular hemorrhage in preterm infants on assisted ventilation-an overview of systematic reviews. *The Cochrane Library*. 2017.
6. Ramenghi LA, Fumagalli M, Groppo M, Consonni D, Gatti L, Bertazzi PA, et al. Germinal matrix hemorrhage: intraventricular hemorrhage in very-low-birth-weight infants: the independent role of inherited thrombophilia. *Stroke*. 2011;42(7):1889-93.
7. Bermick J, Dechert R, Sarkar S. Does hyperglycemia in hypernatremic preterm infants increase the risk of intraventricular hemorrhage? *J Perinatol*. 2016;36(9):729.
8. Poryo M, Boeckh JC, Gortner L, Zemlin M, Duppré P, Ebrahimi-Fakhari D, et al. Ante-, peri- and postnatal factors associated with intraventricular hemorrhage in very premature infants. *Early human development*. 2018;116:1-8.
9. Chevallier M, Debillon T, Pierrat V, Delorme P, Kayem G, Durox M, et al. Leading causes of preterm delivery as risk factors for intraventricular hemorrhage in very preterm infants: results of the EPIPAGE 2 cohort study. *American Journal of Obstetrics & Gynecology*. 2017;216(5):518. e1-. e12.
10. DiSalvo D. The correlation between placental pathology and intraventricular hemorrhage in the preterm infant. *The Developmental Epidemiology Network Investigators. Pediatric research*. 1998;43(1):15-9.
11. Jackson CM, Wells CB, Tabangin ME, Meinzen-Derr J, Jobe AH, Chougnet CA. Pro-inflammatory immune responses in leukocytes of premature infants exposed to maternal chorioamnionitis or funisitis. *Pediatric research*. 2017;81(2):384.
12. Cornette L. Fetal and neonatal inflammatory response and adverse outcome. *Semin Fetal Neonatal Med*. 2004;9(6):459-70.
13. Thomas W, Speer CP. Chorioamnionitis: important risk factor or innocent bystander for neonatal outcome? *Neonatology*. 2011;99(3):177-87.
14. Tita AT, Andrews WW. Diagnosis and management of clinical chorioamnionitis. *Clin Perinatol*. 2010;37(2):339-54.
15. Pugni L, Pietrasanta C, Acaia B, Merlo D, Ronchi A, Ossola MW, et al. Chorioamnionitis and neonatal outcome in preterm infants: a clinical overview. *J Matern Fetal Neonatal Med*. 2015:1-5.
16. Gantert M, Been JV, Gavilanes AW, Garnier Y, Zimmermann LJ, Kramer BW. Chorioamnionitis: a multiorgan disease of the fetus? *J Perinatol*. 2010;30 Suppl:S21-30.
17. Hartling L, Liang Y, Lacaze-Masmonteil T. Chorioamnionitis as a risk factor for bronchopulmonary dysplasia: a systematic review and meta-analysis. *Arch Dis Child Fetal Neonatal Ed*. 2012;97(1):F8-F17.
18. Wu YW, Colford JM, Jr. Chorioamnionitis as a risk factor for cerebral palsy: A meta-analysis. *JAMA*. 2000;284(11):1417-24.
19. Park HW, Choi YS, Kim KS, Kim SN. Chorioamnionitis and Patent Ductus Arteriosus: A Systematic Review and Meta-Analysis. *PLoS One*. 2015;10(9):e0138114.
20. Behbodi E, Villamor-Martínez E, Degraeuwe PL, Villamor E. Chorioamnionitis appears not to be a Risk Factor for Patent Ductus Arteriosus in Preterm Infants: A Systematic Review and Meta-Analysis. *Sci Rep*. 2016;6.
21. Been JV, Lievens S, Zimmermann LJ, Kramer BW, Wolfs TG. Chorioamnionitis as a risk factor for necrotizing enterocolitis: a systematic review and meta-analysis. *J Pediatr*. 2013;162(2):236-42 e2.

### E. Villamor-Martinez, M. Fumagalli et al. - Chorioamnionitis and Intraventricular Hemorrhage

22. Villamor-Martinez E, Cavallaro G, Raffaelli G, Rahim OMM, Gulden S, Ghazi AM, et al. Chorioamnionitis as a risk factor for retinopathy of prematurity: an updated systematic review and meta-analysis. *bioRxiv*. 2018:291476.
23. Mitra S, Aune D, Speer CP, Saugstad OD. Chorioamnionitis as a risk factor for retinopathy of prematurity: a systematic review and meta-analysis. *Neonatology*. 2014;105(3):189-99.
24. Strunk T, Inder T, Wang X, Burgner D, Mallard C, Levy O. Infection-induced inflammation and cerebral injury in preterm infants. *The Lancet infectious diseases*. 2014;14(8):751-62.
25. Moher D, Liberati A, Tetzlaff J, Altman DG, Group P. Preferred reporting items for systematic reviews and meta-analyses: the PRISMA statement. *PLoS Med*. 2009;6(7):e1000097.
26. Wells GA, Shea B, O'Connell D, Peterson J, Welch V, Losos M. The Newcastle-Ottawa Scale (NOS) for assessing the quality of nonrandomized studies in meta-analyses. [Available from: [http://www.ohri.ca/programs/clinical\\_epidemiology/oxford.htm](http://www.ohri.ca/programs/clinical_epidemiology/oxford.htm)]
27. Wan X, Wang W, Liu J, Tong T. Estimating the sample mean and standard deviation from the sample size, median, range and/or interquartile range. *BMC Med Res Methodol*. 2014;14(1):135.
28. Borenstein M, Hedges LV, Higgins J, Rothstein HR. Subgroup analyses. *Introduction to Meta-analysis2009*. p. 149-86.
29. Borenstein M, Hedges LV, Higgins J, Rothstein HR. Identifying and quantifying heterogeneity. *Introduction to Meta-Analysis2009*. p. 107-26.
30. Borenstein M, Hedges LV, Higgins J, Rothstein HR. Meta-Regression. *Introduction to Meta-Analysis2009*. p. 187-203.
31. Ådén U, Lin A, Carlo W, Leviton A, Murray JC, Hallman M, et al. Candidate gene analysis: severe intraventricular hemorrhage in inborn preterm neonates. *J Pediatr*. 2013;163(5):1503-6. e1.
32. Ahn HM, Park EA, Cho SJ, Kim Y-J, Park H-S. The association of histological chorioamnionitis and antenatal steroids on neonatal outcome in preterm infants born at less than thirty-four weeks' gestation. *Neonatology*. 2012;102(4):259-64.
33. Alexander JM, Gilstrap LC, Cox SM, McIntire DM, Leveno KJ. Clinical chorioamnionitis and the prognosis for very low birth weight infants. *Obstet Gynecol*. 1998;91(5, Part 1):725-9.
34. Arayici S, Kadioglu Simsek G, Oncel MY, Eras Z, Canpolat FE, Oguz SS, et al. The effect of histological chorioamnionitis on the short-term outcome of preterm infants  $\leq$  32 weeks: a single-center study. *J Matern Fetal Neonatal Med*. 2014;27(11):1129-33.
35. Austeng D, Blennow M, Ewald U, Fellman V, Fritz T, Hellstrom-Westas L, et al. Incidence of and risk factors for neonatal morbidity after active perinatal care: extremely preterm infants study in Sweden (EXPRESS). *Acta Paediatr*. 2010;99(7):978-92.
36. Babnik J, Stucin-Gantar I, Kornhauser-Cerar L, Sinkovec J, Wraber B, Derganc M. Intrauterine inflammation and the onset of peri-intraventricular hemorrhage in premature infants. *Neonatology*. 2006;90(2):113-21.
37. Barrera-Reyes R, Ruiz-Macias H, Segura-Cervantes E. [Neurodevelopment at one year of age [corrected] in preterm newborns with history of maternal chorioamnionitis]. *Ginecologia y obstetricia de Mexico*. 2011;79(1):31-7.
38. Baumert M, Brozek G, Paprotny M, Walencka Z, Sodowska H, Cnota W, et al. Epidemiology of peri/intraventricular haemorrhage in newborns at term. *J Physiol Pharmacol*. 2008;59(Suppl 4):67-75.

### E. Villamor-Martinez, M. Fumagalli et al. - Chorioamnionitis and Intraventricular Hemorrhage

39. Been JV, Rours IG, Kornelisse RF, Passos VL, Kramer BW, Schneider TA, et al. Histologic chorioamnionitis, fetal involvement, and antenatal steroids: effects on neonatal outcome in preterm infants. *Am J Obstet Gynecol.* 2009;201(6):587. e1-. e8.
40. Bordigato MA, Piva D, Di Gangi IM, Giordano G, Chiandetti L, Filippone M. Asymmetric dimethylarginine in ELBW newborns exposed to chorioamnionitis. *Early Hum Dev.* 2011;87(2):143-5.
41. Botet F, Figueras J, Carbonell-Estrany X, Arca G, Group CS. Effect of maternal clinical chorioamnionitis on neonatal morbidity in very-low birthweight infants: a case-control study. *J Perinat Med.* 2010;38(3):269-73.
42. Bry K, Jacobsson B, Nilsson S, Bry K. Gastric fluid cytokines are associated with chorioamnionitis and white blood cell counts in preterm infants. *Acta Paediatr.* 2015;104(6):575-80.
43. Dalton J, Dechert RE, Sarkar S. Assessment of association between rapid fluctuations in serum sodium and intraventricular hemorrhage in hypernatremic preterm infants. *Am J Perinatol.* 2015;32(08):795-802.
44. Dempsey E, Chen M-F, Kokottis T, Vallerand D, Usher R. Outcome of neonates less than 30 weeks gestation with histologic chorioamnionitis. *Am J Perinatol.* 2005;22(03):155-9.
45. Dexter SC, Pinar H, Malee MP, Hogan J, Carpenter MW, Vohr BR. Outcome of very low birth weight infants with histopathologic chorioamnionitis. *Obstet Gynecol.* 2000;96(2):172-7.
46. Ecevit A, Anuk-İnce D, Yapakçı E, Kupana-Ayva Ş, Kurt A, Yanık FF, et al. Association of respiratory distress syndrome and perinatal hypoxia with histologic chorioamnionitis in preterm infants. *Turk J Pediatr.* 2014;56(1).
47. Elimian A, Verma U, Beneck D, Cipriano R, Visintainer P, Tejani N. Histologic chorioamnionitis, antenatal steroids, and perinatal outcomes. *Obstet Gynecol.* 2000;96(3):333-6.
48. Erdemir G, Kultursay N, Calkavur S, Zekioğlu O, Koroglu OA, Cakmak B, et al. Histological chorioamnionitis: effects on premature delivery and neonatal prognosis. *Pediatr Neonatol.* 2013;54(4):267-74.
49. Fung G, Bawden K, Chow P, Yu V. Long-term Outcome of Extremely Preterm Infants Following Chorioamnionitis 絨毛膜羊膜炎對極早早產兒的長遠影響. *HK J Paediatr (new series).* 2003;8(2):87-92.
50. Gagliardi L, Rusconi F, Bellù R, Zanini R, Network IN. Association of maternal hypertension and chorioamnionitis with preterm outcomes. *Pediatrics.* 2014;134(1):e154-e61.
51. Garcia-Munoz Rodrigo F, Galan Henriquez G, Figueras Aloy J, Garcia-Alix Perez A, Network S. Outcomes of very-low-birth-weight infants exposed to maternal clinical chorioamnionitis: a multicentre study. *Neonatology.* 2014;106(3):229-34.
52. Gawade PL, Whitcomb BW, Chasan-Taber L, Pekow PS, Ronnenberg AG, Shah B, et al. Second stage of labor and intraventricular hemorrhage in early preterm infants in the vertex presentation. *J Matern Fetal Neonatal Med.* 2013;26(13):1292-8.
53. González-Luis G, García IJ, Rodríguez-Miguélez J, Mussons FB, Aloy JF, editors. *Patología neonatal en los menores de 1.500 gramos con relación al antecedente de corioamnionitis. Anales de Pediatría; 2002. Included study Elsevier.*
54. Gray PH, Hurley TM, Rogers YM, O'Callaghan MJ, Tudehope DI, Burns YR, et al. Survival and neonatal and neurodevelopmental outcome of 24–29 week gestation infants according to primary cause of preterm delivery. *Aust N Z J Obstet Gynaecol.* 1997;37(2):161-8.

### E. Villamor-Martinez, M. Fumagalli et al. - Chorioamnionitis and Intraventricular Hemorrhage

55. Hendson L, Russell L, Robertson CM, Liang Y, Chen Y, Abdalla A, et al. Neonatal and neurodevelopmental outcomes of very low birth weight infants with histologic chorioamnionitis. *J Pediatr*. 2011;158(3):397-402.
56. Hitti J, Tarczy-Hornoch P, Murphy J, Hillier SL, Aura J, Eschenbach DA. Amniotic fluid infection, cytokines, and adverse outcome among infants at 34 weeks' gestation or less. *Obstet Gynecol*. 2001;98(6):1080-8.
57. Holcroft CJ, Blakemore KJ, Allen M, Graham EM. Association of prematurity and neonatal infection with neurologic morbidity in very low birth weight infants. *Obstet Gynecol*. 2003;101(6):1249-53.
58. Kallankari H, Kaukola T, Ojaniemi M, Herva R, Perhomaa M, Vuolteenaho R, et al. Chemokine CCL18 predicts intraventricular hemorrhage in very preterm infants. *Ann Med*. 2010;42(6):416-25.
59. Kaukola T, Herva R, Perhomaa M, Pääkkö E, Kingsmore S, Vainionpää L, et al. Population cohort associating chorioamnionitis, cord inflammatory cytokines and neurologic outcome in very preterm, extremely low birth weight infants. *Pediatr Res*. 2006;59(3):478-83.
60. Kidokoro H, Anderson PJ, Doyle LW, Woodward LJ, Neil JJ, Inder TE. Brain injury and altered brain growth in preterm infants: predictors and prognosis. *Pediatrics*. 2014;134(3):e2013-336.
61. Kim SY, Choi CW, Jung E, Lee J, Lee JA, Kim H, et al. Neonatal Morbidities Associated with Histologic Chorioamnionitis Defined Based on the Site and Extent of Inflammation in Very Low Birth Weight Infants. *J Korean Med Sci*. 2015;30(10):1476-82.
62. Kirchner L, Helmer H, Heinze G, Wald M, Brunbauer M, Weninger M, et al. Amnionitis with *Ureaplasma urealyticum* or other microbes leads to increased morbidity and prolonged hospitalization in very low birth weight infants. *Eur J Obstet Gynecol Reprod Biol*. 2007;134(1):44-50.
63. Klebermass-Schrehof K, Czaba C, Olischar M, Fuiko R, Waldhoer T, Rona Z, et al. Impact of low-grade intraventricular hemorrhage on long-term neurodevelopmental outcome in preterm infants. *Childs Nerv Syst*. 2012;28(12):2085-92.
64. Kosuge S, Ohkuchi A, Minakami H, Matsubara S, Uchida A, Eguchi Y, et al. Influence of chorioamnionitis on survival and morbidity in singletons live-born at < 32 weeks of gestation. *Acta Obstet Gynecol Scand*. 2000;79(10):861-5.
65. Lau J, Magee F, Qiu Z, Houbé J, Von Dadelszen P, Lee SK. Chorioamnionitis with a fetal inflammatory response is associated with higher neonatal mortality, morbidity, and resource use than chorioamnionitis displaying a maternal inflammatory response only. *Am J Obstet Gynecol*. 2005;193(3):708-13.
66. Lee HJ, Kim E-K, Kim H-S, Choi CW, Kim BI, Choi J-H. Chorioamnionitis, respiratory distress syndrome and bronchopulmonary dysplasia in extremely low birth weight infants. *J Perinatol*. 2011;31(3):166-70.
67. Lee JY, Kim HS, Jung E, Kim ES, Shim GH, Lee HJ, et al. Risk factors for periventricular-intraventricular hemorrhage in premature infants. *J Korean Med Sci*. 2010;25(3):418-24.
68. Lim W, Lien R, Chiang M, Fu R, Lin J, Chu S, et al. Hypermnatremia and grade III/IV intraventricular hemorrhage among extremely low birth weight infants. *J Perinatol*. 2011;31(3):193-8.
69. Linder N, Haskin O, Levit O, Klinger G, Prince T, Naor N, et al. Risk factors for intraventricular hemorrhage in very low birth weight premature infants: a retrospective case-control study. *Pediatrics*. 2003;111(5):e590-e5.
70. Liu Z, Tang Z, Li J, Yang Y. Effects of placental inflammation on neonatal outcome in preterm infants. *Pediatr Neonatol*. 2014;55(1):35-40.



### E. Villamor-Martinez, M. Fumagalli et al. - Chorioamnionitis and Intraventricular Hemorrhage

71. Logan JW, Westra SJ, Allred EN, O'Shea TM, Kuban K, Paneth N, et al. Antecedents of perinatal cerebral white matter damage with and without intraventricular hemorrhage in very preterm newborns. *Pediatr Neurol.* 2013;49(2):88-96.
72. Lu H, Wang Q, Lu J, Zhang Q, Kumar P. Risk factors for intraventricular hemorrhage in preterm infants born at 34 weeks of gestation or less following preterm premature rupture of membranes. *J Stroke Cerebrovasc Dis.* 2016;25(4):807-12.
73. Mehta R, Nanjundaswamy S, Shen-Schwarz S, Petrova A. Neonatal morbidity and placental pathology. *Indian J Pediatr.* 2006;73(1):25-8.
74. Mestan K, Yu Y, Matoba N, Cerda S, Demmin B, Pearson C, et al. Placental inflammatory response is associated with poor neonatal growth: preterm birth cohort study. *Pediatrics.* 2010;125(4):e891-e8.
75. Miyazaki K, Furuhashi M, Ishikawa K, Tamakoshi K, Hayashi K, Kai A, et al. Impact of chorioamnionitis on short-and long-term outcomes in very low birth weight preterm infants: the Neonatal Research Network Japan. *J Matern Fetal Neonatal Med.* 2016;29(2):331-7.
76. Morales WJ. The effect of chorioamnionitis on the developmental outcome of preterm infants at one year. *Obstet Gynecol.* 1987;70(2):183-6.
77. Mu S-C, Lin C-H, Chen Y-L, Ma H-J, Lee J-S, Lin M-I, et al. Impact on neonatal outcome and anthropometric growth in very low birth weight infants with histological chorioamnionitis. *J Formos Med Assoc.* 2008;107(4):304-10.
78. Nasef N, Shabaan AE, Schurr P, Iaboni D, Choudhury J, Church P, et al. Effect of clinical and histological chorioamnionitis on the outcome of preterm infants. *Am J Perinatol.* 2013;30(01):059-68.
79. Ogunyemi D, Murillo M, Jackson U, Hunter N, Alperson B. The relationship between placental histopathology findings and perinatal outcome in preterm infants. *J Matern Fetal Neonatal Med.* 2003;13(2):102-9.
80. Oh KJ, Park JY, Lee J, Hong J-S, Romero R, Yoon BH. The combined exposure to intra-amniotic inflammation and neonatal respiratory distress syndrome increases the risk of intraventricular hemorrhage in preterm neonates. *J Perinat Med.* 2018;46(1):9-20.
81. Oh S-H, Kim J-j, Do H-j, Lee BS, Kim K-S, Kim EA-R. Preliminary Study on Neurodevelopmental Outcome and Placental Pathology among Extremely Low Birth Weight Infants. *Korean J Perinatol.* 2015;26(1):67-77.
82. Ohyama M, Itani Y, Yamanaka M, Goto A, Kato K, Ijiri R, et al. Re-evaluation of chorioamnionitis and funisitis with a special reference to subacute chorioamnionitis. *Hum Pathol.* 2002;33(2):183-90.
83. Osmanağaoğlu MA, Ünal S, Bozkaya H. Chorioamnionitis risk and neonatal outcome in preterm premature rupture of membranes. *Arch Gynecol Obstet.* 2005;271(1):33-9.
84. Pappas A, Kendrick DE, Shankaran S, Stoll BJ, Bell EF, Laptook AR, et al. Chorioamnionitis and early childhood outcomes among extremely low-gestational-age neonates. *JAMA Pediatr.* 2014;168(2):137-47.
85. Perrone S, Toti P, Toti MS, Badii S, Becucci E, Gatti MG, et al. Perinatal outcome and placental histological characteristics: a single-center study. *J Matern Fetal Neonatal Med.* 2012;25(sup1):110-3.
86. Polam S, Koons A, Anwar M, Shen-Schwarz S, Hegyi T. Effect of chorioamnionitis on neurodevelopmental outcome in preterm infants. *Arch Pediatr Adolesc Med.* 2005;159(11):1032-5.
87. Poralla C, Hertfelder H-J, Oldenburg J, Müller A, Bartmann P, Heep A. Elevated interleukin-6 concentration and alterations of the coagulation system are associated with the development of intraventricular hemorrhage in extremely preterm infants. *Neonatology.* 2012;102(4):270-5.



### E. Villamor-Martinez, M. Fumagalli et al. - Chorioamnionitis and Intraventricular Hemorrhage

88. Richardson BS, Wakim E, Walton J. Preterm histologic chorioamnionitis: impact on cord gas and pH values and neonatal outcome. *Am J Obstet Gynecol.* 2006;195(5):1357-65.
89. Rocha G, Proença E, Quintas C, Rodrigues T, Guimarães H. Chorioamnionitis and neonatal morbidity. *Acta Med Port.* 2006;19(3):207-12.
90. Rodríguez-Trujillo A, Cobo T, Vives I, Bosch J, Kacerovsky M, Posadas DE, et al. Gestational age is more important for short-term neonatal outcome than microbial invasion of the amniotic cavity or intra-amniotic inflammation in preterm prelabor rupture of membranes. *Acta Obstet Gynecol Scand.* 2016;95(8):926-33.
91. Rong Z, Liu H, Xia S, Chang L. Risk and protective factors of intraventricular hemorrhage in preterm babies in Wuhan, China. *Childs Nerv Syst.* 2012;28(12):2077-84.
92. Ryckman KK, Dagle JM, Kelsey K, Momany AM, Murray JC. Replication of genetic associations in the inflammation, complement, and coagulation pathways with intraventricular hemorrhage in LBW preterm neonates. *Pediatr Res.* 2011;70(1):90-5.
93. Salas AA, Faye-Petersen OM, Sims B, Peralta-Carcelen M, Reilly SD, McGwin G, et al. Histological characteristics of the fetal inflammatory response associated with neurodevelopmental impairment and death in extremely preterm infants. *J Pediatr.* 2013;163(3):652-7. e2.
94. Sarkar S, Kaplan C, Wiswell TE, Spitzer AR. Histological chorioamnionitis and the risk of early intraventricular hemorrhage in infants born  $\leq$  28 weeks gestation. *J Perinatol.* 2005;25(12):749-52.
95. Sato M, Nishimaki S, Yokota S, Seki K, Horiguchi H, An H, et al. Severity of chorioamnionitis and neonatal outcome. *J Obstet Gynaecol Res.* 2011;37(10):1313-9.
96. Seliga-Siwecka JP, Kornacka MK. Neonatal outcome of preterm infants born to mothers with abnormal genital tract colonisation and chorioamnionitis: a cohort study. *Early Hum Dev.* 2013;89(5):271-5.
97. Shankaran S, Lin A, Maller-Kesselman J, Zhang H, O'shea TM, Bada HS, et al. Maternal race, demography, and health care disparities impact risk for intraventricular hemorrhage in preterm neonates. *J Pediatr.* 2014;164(5):1005-11. e3.
98. Smit AL, Been JV, Zimmermann LJ, Kornelisse RF, Andriessen P, Vanterpool SF, et al. Automated auditory brainstem response in preterm newborns with histological chorioamnionitis. *J Matern Fetal Neonatal Med.* 2015;28(15):1864-9.
99. Soraisham A, Trevenen C, Wood S, Singhal N, Sauve R. Histological chorioamnionitis and neurodevelopmental outcome in preterm infants. *J Perinatol.* 2013;33(1):70-5.
100. Soraisham AS, Singhal N, McMillan DD, Sauve RS, Lee SK, Network CN. A multicenter study on the clinical outcome of chorioamnionitis in preterm infants. *Am J Obstet Gynecol.* 2009;200(4):372. e1-. e6.
101. Suarez RD, Grobman WA, Parilla BV. Indomethacin tocolysis and intraventricular hemorrhage. *Obstet Gynecol.* 2001;97(6):921-5.
102. Suppiej A, Franzoi M, Vedovato S, Marucco A, Chiarelli S, Zanardo V. Neurodevelopmental outcome in preterm histological chorioamnionitis. *Early Hum Dev.* 2009;85(3):187-9.
103. Trevisanuto D, Peruzzetto C, Cavallin F, Vedovato S, Cosmi E, Visentin S, et al. Fetal placental inflammation is associated with poor neonatal growth of preterm infants: a case-control study. *J Matern Fetal Neonatal Med.* 2013;26(15):1484-90.
104. Tsiartas P, Kacerovsky M, Musilova I, Hornychova H, Cobo T, Sävman K, et al. The association between histological chorioamnionitis, funisitis and neonatal outcome in women with preterm prelabor rupture of membranes. *J Matern Fetal Neonatal Med.* 2013;26(13):1332-6.

### E. Villamor-Martinez, M. Fumagalli et al. - Chorioamnionitis and Intraventricular Hemorrhage

105. Vaihinger M, Mazzitelli N, Balanian N, Grandi C. The relationship between placental lesions and early hemorrhagic-ischemic cerebral injury in very low birth weight infants. *Rev Fac Cienc Med Cordoba*. 2012;70(3):123-33.
106. van Vliet EO, de Kieviet JF, van der Voorn JP, Been JV, Oosterlaan J, van Elburg RM. Placental pathology and long-term neurodevelopment of very preterm infants. *Am J Obstet Gynecol*. 2012;206(6):489. e1-. e7.
107. Vergani P, Locatelli A, Doria V, Assi F, Paterlini G, Pezzullo JC, et al. Intraventricular hemorrhage and periventricular leukomalacia in preterm infants. *Obstet Gynecol*. 2004;104(2):225-31.
108. Watterberg KL, Gerdes JS, Gifford KL, Lin H-M. Prophylaxis against early adrenal insufficiency to prevent chronic lung disease in premature infants. *Pediatrics*. 1999;104(6):1258-63.
109. Wirbelauer J, Thomas W, Speer CP. Response of leukocytes and nucleated red blood cells in very low-birth weight preterm infants after exposure to intrauterine inflammation. *J Matern Fetal Neonatal Med*. 2011;24(2):348-53.
110. Xu L, Ren R, Zhu S, Zhuang H, Huang Z, Yang H. Effect of chorioamnionitis on brain injury in preterm infants. *Zhongguo Dang Dai Er Ke Za Zhi*. 2012;14(9):661-3.
111. Yamada N, Sato Y, Moriguchi-Goto S, Yamashita A, Kodama Y, Sameshima H, et al. Histological severity of fetal inflammation is useful in predicting neonatal outcome. *Placenta*. 2015;36(12):1490-3.
112. Yanowitz TD, Potter DM, Bowen AD, Baker RW, Roberts JM. Variability in cerebral oxygen delivery is reduced in premature neonates exposed to chorioamnionitis. *Pediatr Res*. 2006;59(2):299-304.
113. Yoon BH, Romero R, Kim CJ, Jun JK, Gomez R, Choi J-H, et al. Amniotic fluid interleukin-6: a sensitive test for antenatal diagnosis of acute inflammatory lesions of preterm placenta and prediction of perinatal morbidity. *Am J Obstet Gynecol*. 1995;172(3):960-70.
114. Zanardo V, Vedovato S, Suppiej A, Trevisanuto D, Migliore M, Di Venosa B, et al. Histological inflammatory responses in the placenta and early neonatal brain injury. *Pediatr Dev Pathol*. 2008;11(5):350-4.
115. De Felice C, Toti P, Laurini RN, Stumpo M, Picciolini E, Todros T, et al. Early neonatal brain injury in histologic chorioamnionitis. *J Pediatr*. 2001;138(1):101-4.
116. Mohamed MA, Aly H. Transport of premature infants is associated with increased risk for intraventricular haemorrhage. *Archives of Disease in Childhood-Fetal and Neonatal Edition*. 2010:fetalneonatal183236.
117. Hartling L, Liang Y, Lacaze-Masmonteil T. Chorioamnionitis as a risk factor for bronchopulmonary dysplasia: a systematic review and meta-analysis. *Archives of Disease in Childhood-Fetal and Neonatal Edition*. 2012;97(1):F8-F17.
118. Been JV, Lievens S, Zimmermann LJ, Kramer BW, Wolfs TG. Chorioamnionitis as a risk factor for necrotizing enterocolitis: a systematic review and meta-analysis. *The Journal of pediatrics*. 2013;162(2):236-42. e2.
119. Wilcox AJ, Weinberg CR, Basso O. On the pitfalls of adjusting for gestational age at birth. *Am J Epidemiol*. 2011;174(9):1062-8.
120. McElrath TF, Hecht JL, Dammann O, Boggess K, Onderdonk A, Markenson G, et al. Pregnancy disorders that lead to delivery before the 28th week of gestation: an epidemiologic approach to classification. *Am J Epidemiol*. 2008;168(9):980-9.
121. Gagliardi L, Rusconi F, Da Frè M, Mello G, Carnielli V, Di Lallo D, et al. Pregnancy disorders leading to very preterm birth influence neonatal outcomes: results of the population-based ACTION cohort study. *Pediatr Res*. 2013;73(6):794-801.

### E. Villamor-Martinez, M. Fumagalli et al. - Chorioamnionitis and Intraventricular Hemorrhage

122. Barros FC, Papageorgiou AT, Victora CG, Noble JA, Pang R, Iams J, et al. The distribution of clinical phenotypes of preterm birth syndrome: implications for prevention. *JAMA pediatrics*. 2015;169(3):220-9.
123. Basso O, Wilcox A. Mortality risk among preterm babies: immaturity vs. underlying pathology. *Epidemiology (Cambridge, Mass)*. 2010;21(4):521.
124. Hernández-Díaz S, Schisterman EF, Hernán MA. The birth weight “paradox” uncovered? *American journal of epidemiology*. 2006;164(11):1115-20.
125. Ballabh P. Pathogenesis and prevention of intraventricular hemorrhage. *Clinics in perinatology*. 2014;41(1):47-67.
126. Yanowitz TD, Jordan JA, Gilmour CH, Towbin R, Bowen AD, Roberts JM, et al. Hemodynamic disturbances in premature infants born after chorioamnionitis: association with cord blood cytokine concentrations. *Pediatric research*. 2002;51(3):310.
127. McAdams RM, Juul SE. The role of cytokines and inflammatory cells in perinatal brain injury. *Neurology research international*. 2012;2012.
128. Rivest S. Molecular insights on the cerebral innate immune system. *Brain, behavior, and immunity*. 2003;17(1):13-9.
129. Molina-Holgado E, Molina-Holgado F. Mending the broken brain: neuroimmune interactions in neurogenesis. *Journal of neurochemistry*. 2010;114(5):1277-90.
130. Stanimirovic D, Satoh K. Inflammatory mediators of cerebral endothelium: a role in ischemic brain inflammation. *Brain Pathology*. 2000;10(1):113-26.
131. Revello R, Alcaide MJ, Dudzik D, Abehsera D, Bartha JL. Differential amniotic fluid cytokine profile in women with chorioamnionitis with and without funisitis. *The Journal of Maternal-Fetal & Neonatal Medicine*. 2015:1-5.
132. Revello R, Alcaide MJ, Dudzik D, Abehsera D, Bartha JL. Differential amniotic fluid cytokine profile in women with chorioamnionitis with and without funisitis. *J Matern Fetal Neonatal Med*. 2015:1-5.
133. Higgins RD, Saade G, Polin RA, Grobman WA, Buhimschi IA, Watterberg K, et al. Evaluation and management of women and newborns with a maternal diagnosis of chorioamnionitis: summary of a workshop. *Obstet Gynecol*. 2016;127(3):426-36.
134. Leviton A, Kuban K, Paneth N. Intraventricular haemorrhage grading scheme: time to abandon? *Acta Pædiatrica*. 2007;96(9):1254-6.

**E. Villamor-Martinez, M. Fumagalli et al. - Chorioamnionitis and Intraventricular Hemorrhage**

**1 Tables**

**Table 1.** Meta-analysis of the association between chorioamnionitis and covariates.

| Meta-analysis                | Chorioamni<br>onitis | k  | Effect size | 95% CI           | Z      | p      | Heterogeneity |        |                |
|------------------------------|----------------------|----|-------------|------------------|--------|--------|---------------|--------|----------------|
|                              |                      |    |             |                  |        |        | Q             | p      | I <sup>2</sup> |
| Gestational age<br>(weeks)   | Clinical             | 11 | MD -0.73    | -1.16 to -0.30   | -3.35  | 0.001  | 140           | <0.001 | 92.9           |
|                              | Histological         | 42 | MD -1.27    | -1.49 to -1.05   | -11.42 | <0.001 | 495           | <0.001 | 91.7           |
|                              | Any type             | 56 | MD -1.20    | -1.40 to -1.00   | -11.66 | <0.001 | 839           | <0.001 | 93.4           |
| Birth weight (g)             | Clinical             | 11 | MD -29.14   | -77.66 to 19.39  | -1.18  | 0.239  | 107           | <0.001 | 90.6           |
|                              | Histological         | 41 | MD -70.21   | -96.71 to -43.72 | -5.19  | <0.001 | 362           | <0.001 | 89.0           |
|                              | Any type             | 55 | MD -55.00   | -74.89 to -35.12 | -5.42  | <0.001 | 474           | <0.001 | 88.6           |
| Antenatal<br>corticosteroids | Clinical             | 5  | OR 1.10     | 0.76 to 1.60     | 0.52   | 0.605  | 55            | <0.001 | 92.8           |
|                              | Histological         | 31 | OR 1.20     | 1.01 to 1.42     | 2.03   | 0.043  | 95            | <0.001 | 68.3           |
|                              | Any type             | 38 | OR 1.19     | 1.02 to 1.38     | 2.28   | 0.023  | 155           | <0.001 | 76.1           |
| Cesarean<br>section          | Clinical             | 8  | OR 0.53     | 0.30 to 0.93     | -2.23  | 0.026  | 316           | <0.001 | 97.8           |
|                              | Histological         | 28 | OR 0.33     | 0.25 to 0.45     | -7.32  | <0.001 | 177           | <0.001 | 84.8           |
|                              | Any type             | 36 | OR 0.37     | 0.29 to 0.47     | -8.06  | <0.001 | 495           | <0.001 | 92.9           |
| SGA                          | Histological         | 15 | OR 0.33     | 0.23 to 0.49     | -5.53  | <0.001 | 79            | <0.001 | 82.3           |
|                              | Any type             | 16 | OR 0.34     | 0.23 to 0.50     | -5.64  | <0.001 | 80            | <0.001 | 81.2           |
| Preeclampsia                 | Clinical             | 3  | OR 0.16     | 0.09 to 0.29     | -5.98  | <0.001 | 2             | 0.369  | <0.001         |
|                              | Histological         | 23 | OR 0.15     | 0.11 to 0.20     | -13.09 | <0.001 | 65            | <0.001 | 66.2           |
|                              | Any type             | 27 | OR 0.15     | 0.12 to 0.20     | -15.25 | <0.001 | 69            | <0.001 | 62.2           |
| PROM                         | Clinical             | 3  | OR 5.02     | 2.71 to 9.31     | 5.12   | <0.001 | 2             | <0.001 | 18             |
|                              | Histological         | 27 | OR 3.14     | 2.54 to 3.87     | 10.63  | <0.001 | 149           | <0.001 | 82.6           |
|                              | Any type             | 30 | OR 3.29     | 2.70 to 4.02     | 11.76  | <0.001 | 155           | <0.001 | 81.3           |
| Male sex                     | Clinical             | 8  | OR 1.10     | 0.80 to 1.53     | 0.58   | 0.560  | 80            | <0.001 | 91.2           |
|                              | Histological         | 35 | OR 0.99     | 0.89 to 1.11     | -0.15  | 0.881  | 91            | <0.001 | 62.8           |
|                              | Any type             | 46 | OR 1.00     | 0.90 to 1.12     | 0.07   | 0.941  | 193           | <0.001 | 76.7           |
| Maternal<br>diabetes         | Any type             | 9  | OR 0.81     | 0.65 to 1.01     | -1.92  | 0.055  | 5             | 0.725  | 0.0            |
| EOS                          | Clinical             | 7  | OR 4.41     | 3.58 to 5.42     | 14.08  | <0.001 | 9             | 0.197  | 30.3           |
|                              | Histological         | 18 | OR 2.62     | 1.88 to 3.65     | 5.68   | <0.001 | 48            | <0.001 | 64.9           |
|                              | Any type             | 25 | OR 3.81     | 3.20 to 4.54     | 14.96  | <0.001 | 87            | <0.001 | 72.4           |
| LOS                          | Clinical             | 5  | OR 1.41     | 1.10 to 1.81     | 2.68   | 0.007  | 17            | 0.002  | 76.8           |
|                              | Histological         | 30 | OR 1.53     | 1.27 to 1.84     | 4.45   | <0.001 | 134           | <0.001 | 78.3           |
|                              | Any type             | 37 | OR 1.55     | 1.34 to 1.80     | 5.82   | <0.001 | 174           | <0.001 | 79.3           |
| PDA                          | Clinical             | 4  | OR 1.30     | 1.04 to 1.64     | 2.27   | 0.023  | 7             | 0.062  | 59.0           |
|                              | Histological         | 26 | OR 1.41     | 1.15 to 1.72     | 3.35   | 0.001  | 144           | <0.001 | 82.6           |
|                              | Any type             | 31 | OR 1.60     | 1.35 to 1.80     | 6.00   | <0.001 | 195           | <0.001 | 84.6           |
| RDS                          | Clinical             | 3  | OR 2.01     | 0.48 to 8.41     | 0.95   | 0.341  | 11            | 0.004  | 82.0           |
|                              | Histological         | 15 | OR 1.09     | 0.81 to 1.45     | 0.55   | 0.582  | 89            | <0.001 | 84.3           |
|                              | Any type             | 21 | OR 1.00     | 0.78 to 1.29     | 0.01   | 0.990  | 149           | <0.001 | 86.6           |

**E. Villamor-Martinez, M. Fumagalli et al. - Chorioamnionitis and Intraventricular Hemorrhage**

CI: confidence interval; MD: mean difference; OR: odds ratio; SGA: small for gestational age; PROM: premature rupture of membranes; EOS: early-onset sepsis; LOS: late-onset sepsis; PDA: patent ductus arteriosus; RDS: respiratory distress syndrome.

**Table 2.** Random effects meta-regression of IVH risk in the chorioamnionitis group, and mean difference in gestational age and birth weight.

| <b>IVH grade</b> | <b>Meta-regression</b>                     | <b>k</b> | <b>CC</b> | <b>95% CI</b>   | <b>Z</b> | <b>p</b> | <b>R<sup>2</sup></b> |
|------------------|--------------------------------------------|----------|-----------|-----------------|----------|----------|----------------------|
| All grades       | Mean difference gestational age (per week) | 35       | -0.02     | -0.19 to 0.16   | -0.17    | 0.863    | 0.00                 |
| IVH              | Mean difference birth weight (per 100 g)   | 35       | 0.00      | -0.001 to 0.001 | 0.07     | 0.942    | 0.00                 |
| Grades 1-2       | Mean difference gestational age (per week) | 20       | 0.05      | -0.15 to 0.25   | 0.51     | 0.613    | 0.00                 |
| IVH              | Mean difference birth weight (per 100 g)   | 20       | 0.13      | -0.07 to 0.33   | 1.27     | 0.203    | 0.54                 |
| Grades 3-4       | Mean difference gestational age (per week) | 37       | -0.19     | -0.43 to 0.04   | -1.62    | 0.105    | 0.29                 |
| IVH              | Mean difference birth weight (per 100 g)   | 37       | -0.10     | -0.30 to 0.10   | -1.01    | 0.312    | 0.00                 |

IVH: intraventricular hemorrhage; *k*: numer of included studies; CC: coefficient; CI: confidence interval;

**E. Villamor-Martinez, M. Fumagalli et al. - Chorioamnionitis and Intraventricular Hemorrhage**

**Table 3.** Random effects meta-regression of IVH risk in the chorioamnionitis group, and predefined covariates.

| IVH grade      | Meta-regression                               | k     | CC            | 95% CI        | Z     | P      | R <sup>2</sup> |
|----------------|-----------------------------------------------|-------|---------------|---------------|-------|--------|----------------|
| All grades IVH | Chorioamnionitis type (histological/clinical) | 49    | -0.08         | -0.45 to 0.29 | -0.42 | 0.673  | 0.00           |
|                | Funisitis (CA+F+ vs. CA+F-)                   | 9     | -0.12         | -0.62 to 0.38 | -0.49 | 0.627  | 0.00           |
|                | ACS (log OR)                                  | 25    | 0.01          | -0.46 to 0.49 | 0.05  | 0.964  | 0.00           |
|                | Cesarean section (log OR)                     | 22    | -0.07         | -0.47 to 0.32 | -0.36 | 0.717  | 0.00           |
|                | Maternal age (MD)                             | 17    | -0.08         | -0.24 to 0.07 | -1.09 | 0.276  | 0.00           |
|                | SGA (log OR)                                  | 11    | 0.39          | -0.09 to 0.88 | 1.59  | 0.111  | 0.54           |
|                | PROM (log OR)                                 | 20    | -0.40         | -1.06 to 0.26 | -1.19 | 0.233  | 0.08           |
|                | Preeclampsia (log OR)                         | 16    | 0.03          | -0.40 to 0.45 | 0.13  | 0.897  | 0.00           |
|                | Mortality (log OR)                            | 26    | 0.18          | -0.15 to 0.50 | 1.07  | 0.285  | 0.07           |
|                | Early onset sepsis (log OR)                   | 14    | 0.13          | -0.47 to 0.73 | 0.42  | 0.672  | 0.00           |
|                | Late onset sepsis (log OR)                    | 24    | -0.04         | -0.39 to 0.32 | -0.19 | 0.846  | 0.00           |
|                | PDA (log OR)                                  | 22    | 0.13          | -0.21 to 0.48 | 0.75  | 0.453  | 0.00           |
| RDS (log OR)   | 21                                            | 0.02  | -0.22 to 0.27 | 0.22          | 0.827 | 0.00   |                |
| Grades 3-4 IVH | Chorioamnionitis type (histological/clinical) | 46    | -0.07         | -0.44 to 0.30 | -0.37 | 0.708  | 0.00           |
|                | Funisitis (CA+F+ vs. CA+F-)                   | 8     | 0.07          | -0.29 to 0.44 | 0.40  | 0.691  | 0.00           |
|                | ACS (log OR)                                  | 28    | -0.11         | -0.60 to 0.38 | 0.42  | 0.672  | 0.00           |
|                | Cesarean section (log OR)                     | 27    | 0.08          | -0.09 to 0.26 | 0.92  | 0.358  | 0.06           |
|                | Maternal age (MD)                             | 18    | -0.01         | -0.25 to 0.22 | -0.11 | 0.911  | 0.00           |
|                | SGA (log OR)                                  | 12    | 0.24          | -0.19 to 0.67 | 1.08  | 0.280  | 0.22           |
|                | PROM (log OR)                                 | 22    | -0.09         | -0.35 to 0.17 | -0.65 | 0.515  | 0.00           |
|                | Preeclampsia (log OR)                         | 18    | 0.41          | 0.20 to 0.63  | 3.74  | 0.0004 | 1.00           |
|                | Mortality (log OR)                            | 30    | 0.42          | 0.17 to 0.67  | 3.33  | 0.001  | 0.58           |
|                | Early onset sepsis (log OR)                   | 20    | 0.11          | -0.32 to 0.54 | 0.51  | 0.613  | 0.00           |
|                | Late onset sepsis (log OR)                    | 26    | 0.35          | 0.01 to 0.70  | 1.99  | 0.047  |                |
|                | PDA (log OR)                                  | 21    | 0.40          | 0.04 to 0.76  | 2.18  | 0.029  | 0.48           |
| RDS (log OR)   | 27                                            | -0.06 | -0.34 to 0.21 | -0.49         | 0.627 | 0.14   |                |

k: number of studies included; CA: chorioamnionitis; F: funisitis; CC: coefficient; CI: confidence interval; MD: mean difference; OR: odds ratio; ACS: antenatal corticosteroids; SGA: small for gestational age; PROM: premature rupture of membranes; PDA: patent ductus arteriosus; RDS: respiratory distress syndrome.



**E. Villamor-Martinez, M. Fumagalli et al. - Chorioamnionitis and Intraventricular Hemorrhage**

**Table 4.** Subgroup meta-analyses based on difference in gestational age (GA).

| Subgroup of studies                                                                 | IVH definition | k  | OR   | 95% CI       | <i>p</i> |
|-------------------------------------------------------------------------------------|----------------|----|------|--------------|----------|
| Studies where CA-group did not differ significantly in GA from control ( $p>0.05$ ) | All grades IVH | 15 | 1.59 | 1.20 to 2.10 | 0.001    |
|                                                                                     | Grades 3-4 IVH | 14 | 1.54 | 0.99 to 2.39 | 0.055    |
| Studies where CA-group did differ significantly in GA from control ( $p<0.05$ )     | All grades IVH | 20 | 1.71 | 1.46 to 2.01 | <0.001   |
|                                                                                     | Grades 3-4 IVH | 23 | 1.90 | 1.56 to 2.33 | 0.000    |
| Studies where CA-group had a MD in GA of $\leq 0.5$ weeks compared to control       | All grades IVH | 11 | 1.66 | 1.25 to 2.22 | <0.001   |
|                                                                                     | Grades 3-4 IVH | 13 | 1.36 | 1.03 to 1.80 | 0.028    |
| Studies where CA-group had a MD in GA of $>0.5$ weeks compared to control           | All grades IVH | 24 | 1.68 | 1.43 to 1.98 | <0.001   |
|                                                                                     | Grades 3-4 IVH | 23 | 1.99 | 1.64 to 2.41 | <0.001   |
| Studies where CA-group had a MD in GA of $<1$ weeks compared to control             | All grades IVH | 16 | 1.72 | 1.37 to 2.15 | <0.001   |
|                                                                                     | Grades 3-4 IVH | 18 | 1.52 | 1.21 to 1.92 | <0.001   |
| Studies where CA-group had a MD in GA of $\geq 1$ weeks compared to control         | All grades IVH | 19 | 1.65 | 1.37 to 1.97 | <0.001   |
|                                                                                     | Grades 3-4 IVH | 18 | 2.00 | 1.60 to 2.50 | <0.001   |

CA: chorioamnionitis; GA: gestational age; IVH: intraventricular hemorrhage; k: number of studies included; CI: confidence interval; MD: mean difference.
